# Supplementary material
Source: HighWire-hosted journal article supplement (https://hw-f5-jim.highwire.org/content/jim-2020-001471)
Supplement: inline-supplementary-material-1 [file inline-supplementary-material-1.pdf]

Table S1 The differentially expressed lncRNAs

| SourceID           | Regulation | Fold Change (log2) |
|--------------------|------------|--------------------|
| TCONS_00046122     | up         | 1.6722013          |
| XR_146392.1        | down       | -2.922639          |
| ENSRNOT00000074917 | down       | -1.1341887         |
| TCONS_00069705     | down       | -1.2953911         |
| TCONS_00121505     | up         | 1.0858464          |
| TCONS_00015844     | down       | -1.680482          |
| XR_146975.1        | up         | 1.0082858          |
| TCONS_00058779     | up         | 1.8416519          |
| TCONS_00035352     | up         | 1.013946           |
| TCONS_00106331     | up         | 1.2956901          |
| TCONS_00016882     | up         | 1.0218728          |
| TCONS_00075583     | up         | 1.5348034          |
| TCONS_00070962     | down       | -1.0512199         |
| TCONS_00081065     | up         | 1.1182642          |
| Khps1a             | down       | -1.0044928         |
| ENSRNOT00000072137 | down       | -1.7250957         |
| TCONS_00107043     | up         | 1.6346297          |
| TCONS_00079433     | down       | -3.4707518         |
| TCONS_00054665     | down       | -1.0461388         |
| TCONS_00098200     | down       | -1.0833602         |
| ENSRNOT00000000776 | down       | -1.0016274         |
| TCONS_00057757     | up         | 1.3362327          |
| ENSRNOT00000051728 | down       | -1.0351236         |
| TCONS_00085316     | down       | -1.1386886         |
| TCONS_00074204     | up         | 1.5563364          |
| TCONS_00122229     | up         | 1.6074891          |
| TCONS_00113370     | up         | 1.4227815          |
| TCONS_00135887     | down       | -1.1733589         |
| ENSRNOT00000007835 | up         | 2.074921           |
| TCONS_00017466     | down       | -3.6800508         |
| TCONS_00075584     | up         | 1.9450846          |
| TCONS_00113497     | up         | 1.3678348          |
| TCONS_00075654     | up         | 1.5243239          |
| TCONS_00007838     | up         | 2.8794518          |
| TCONS_00129692     | up         | 1.9388752          |
| TCONS_00116801     | up         | 1.2228765          |
| TCONS_00058773     | up         | 2.464663           |
| TCONS_00088890     | up         | 1.0265794          |
| TCONS_00113048     | up         | 1.1821496          |
| TCONS_00121320     | up         | 1.9152572          |
| TCONS_00040507     | up         | 1.8454885          |
| ENSRNOT00000016081 | down       | -1.0201836         |
| TCONS_00016601     | down       | -1.145092          |
| ENSRNOT00000050840 | up         | 1.1003356          |
| TCONS_00089375     | down       | -1.415755          |
| TCONS_00005805     | down       | -1.4009519         |
| TCONS_00090000     | up         | 1.4541917          |
| TCONS_00027530     | up         | 1.2713108          |
| TCONS_00130449     | up         | 1.251504           |
| TCONS_00031685     | up         | 1.7338805          |
| TCONS_00130284     | down       | -2.0228481         |
| TCONS_00113097     | up         | 1.3659296          |
| ENSRNOT00000023216 | up         | 2.091948           |

|                    |      |            |
|--------------------|------|------------|
| XR_146206.1        | down | -1.1641352 |
| TCONS_00061082     | down | -2.607978  |
| TCONS_00089077     | up   | 1.6465391  |
| TCONS_00007980     | up   | 1.0921574  |
| TCONS_00045311     | up   | 4.087612   |
| TCONS_00036308     | up   | 1.1756735  |
| TCONS_00089031     | up   | 1.3646088  |
| XR_146234.1        | up   | 1.2280393  |
| XR_006411.4        | down | -1.2145352 |
| TCONS_00097293     | up   | 1.8464117  |
| TCONS_00075312     | down | -1.1389213 |
| TCONS_00088847     | down | -1.0380752 |
| ENSRNOT00000075149 | down | -2.4022317 |
| TCONS_00062315     | up   | 1.459424   |
| TCONS_00003175     | down | -1.2271128 |
| XR_146765.1        | down | -1.3428969 |
| TCONS_00014506     | up   | 2.798501   |
| TCONS_00024124     | down | -1.4320378 |
| TCONS_00061112     | up   | 1.1064816  |
| TCONS_00082286     | down | -1.067385  |
| TCONS_00097317     | up   | 1.3882651  |
| TCONS_00001681     | up   | 1.6824212  |
| uc.270+            | down | -1.1593616 |
| TCONS_00011925     | up   | 1.4670587  |
| TCONS_00054495     | down | -1.6070707 |
| TCONS_00031782     | up   | 1.0317132  |
| TCONS_00113490     | up   | 1.1752338  |
| TCONS_00135053     | up   | 1.0279348  |
| TCONS_00131261     | up   | 1.231168   |
| TCONS_00045362     | up   | 1.8582802  |
| TCONS_00041490     | up   | 1.0943937  |
| TCONS_00066490     | up   | 1.437787   |
| ENSRNOT00000048070 | up   | 1.3446226  |
| TCONS_00074976     | up   | 2.3592136  |
| TCONS_00033457     | up   | 1.0732088  |
| TCONS_00129855     | down | -1.52144   |
| TCONS_00054395     | up   | 1.1416068  |
| TCONS_00040279     | up   | 3.533719   |
| TCONS_00095165     | up   | 1.0839176  |
| TCONS_00127098     | down | -1.1901057 |
| TCONS_00036513     | down | -1.3223937 |
| TCONS_00089944     | down | -1.4243314 |
| TCONS_00012525     | up   | 1.7774832  |
| uc.159+            | up   | 1.5362549  |
| ENSRNOT00000071003 | down | -1.3403463 |
| ENSRNOT00000058469 | up   | 1.9480133  |
| TCONS_00130082     | down | -1.5281856 |
| ENSRNOT00000039543 | up   | 1.6684513  |
| TCONS_00097586     | up   | 3.0560884  |
| XR_146422.1        | up   | 1.0784688  |
| TCONS_00079461     | up   | 1.7258084  |
| TCONS_00039229     | down | -2.4490976 |
| ENSRNOT00000072153 | up   | 1.2278177  |
| TCONS_00015339     | up   | 1.7968786  |
| uc.129+            | down | -1.7166071 |
| TCONS_00057885     | up   | 1.1196609  |

|                    |      |            |
|--------------------|------|------------|
| TCONS_00077125     | down | -2.1275725 |
| TCONS_00075193     | up   | 2.8929217  |
| TCONS_00068353     | up   | 1.2483311  |
| TCONS_00134303     | up   | 1.2316666  |
| TCONS_00027246     | up   | 1.2078695  |
| TCONS_00037142     | down | -1.1648068 |
| uc.440+            | down | -1.115695  |
| TCONS_00088820     | up   | 1.4060518  |
| TCONS_00135091     | up   | 1.2929296  |
| uc.265+            | down | -2.4675202 |
| TCONS_00079674     | up   | 2.3769052  |
| TCONS_00121752     | down | -1.2834883 |
| TCONS_00113563     | up   | 1.6794753  |
| TCONS_00088796     | up   | 1.3800187  |
| TCONS_00075058     | down | -1.4538765 |
| TCONS_00062599     | up   | 2.7784243  |
| TCONS_00045198     | up   | 2.6782236  |
| TCONS_00134302     | up   | 1.65575    |
| TCONS_00043376     | up   | 1.8722391  |
| TCONS_00057284     | up   | 1.0603712  |
| TCONS_00050013     | up   | 2.1453757  |
| TCONS_00027537     | down | -2.4232543 |
| TCONS_00066311     | down | -1.016942  |
| TCONS_00097499     | down | -2.5211587 |
| TCONS_00134685     | down | -1.5603185 |
| TCONS_00079330     | up   | 1.7266035  |
| TCONS_00070801     | down | -1.8255234 |
| TCONS_00040459     | down | -1.3777058 |
| TCONS_00097515     | down | -1.4990082 |
| TCONS_00010654     | down | -1.2120119 |
| ENSRNOT00000004285 | down | -1.2237883 |
| TCONS_00045302     | up   | 1.3715086  |
| TCONS_00015370     | down | -1.5176233 |
| TCONS_00056997     | down | -1.4093847 |
| TCONS_00090384     | down | -1.0312368 |
| TCONS_00089454     | up   | 1.0209732  |
| TCONS_00113637     | up   | 1.8982468  |
| TCONS_00044800     | down | -1.6277254 |
| TCONS_00074441     | up   | 1.0766737  |
| TCONS_00020195     | down | -1.0394418 |
| TCONS_00051935     | down | -1.5831897 |
| TCONS_00113347     | up   | 1.1064744  |
| TCONS_00121973     | up   | 2.162249   |
| ENSRNOT00000075337 | up   | 1.7109039  |
| TCONS_00097504     | down | -1.1838007 |
| TCONS_00054490     | down | -1.4244118 |
| TCONS_00016393     | down | -1.5363529 |
| TCONS_00062713     | up   | 4.135027   |
| TCONS_00069849     | up   | 1.2559398  |
| TCONS_00042222     | down | -1.2205222 |
| ENSRNOT00000051240 | up   | 1.0087442  |
| TCONS_00118542     | up   | 3.925632   |
| TCONS_00024996     | down | -1.2371943 |
| TCONS_00040899     | up   | 1.8383765  |
| TCONS_00073619     | up   | 1.3071713  |
| TCONS_00135629     | down | -1.4790583 |

|                    |      |            |
|--------------------|------|------------|
| TCONS_00098072     | down | -1.7454175 |
| TCONS_00066302     | down | -1.9992194 |
| TCONS_00130321     | up   | 2.4388714  |
| ENSRNOT00000075146 | up   | 1.5953417  |
| ENSRNOT00000041327 | up   | 1.9914474  |
| TCONS_00113281     | up   | 5.273      |
| XR_146175.1        | down | -1.278682  |
| TCONS_00017480     | down | -1.1255198 |
| XR_086078.1        | down | -3.1612897 |
| TCONS_00016583     | down | -1.9757131 |
| TCONS_00054277     | up   | 1.4161777  |
| TCONS_00031220     | down | -1.3195045 |
| TCONS_00081169     | up   | 2.1171188  |
| TCONS_00097505     | down | -2.4744868 |
| NR_027324.1        | down | -1.1695213 |
| XR_146334.1        | down | -1.085084  |
| TCONS_00106591     | down | -1.0386703 |
| TCONS_00140121     | up   | 1.6986177  |
| TCONS_00114690     | up   | 1.1849291  |
| XR_146412.1        | down | -1.3225098 |
| TCONS_00114975     | up   | 1.4778128  |
| TCONS_00113470     | down | -2.9772139 |
| TCONS_00079299     | down | -1.0865192 |
| TCONS_00089778     | up   | 1.0433798  |
| TCONS_00135440     | down | -1.3161983 |
| TCONS_00117411     | up   | 1.7311058  |
| TCONS_00043176     | up   | 3.6334882  |
| TCONS_00034315     | down | -1.7822671 |
| NR_002704.1        | up   | 2.038457   |
| TCONS_00071731     | up   | 1.4098558  |
| TCONS_00045635     | up   | 1.5964925  |
| TCONS_00074986     | up   | 1.1269372  |
| XR_146638.1        | down | -1.021472  |
| TCONS_00134581     | up   | 1.0947104  |
| TCONS_00015950     | up   | 1.090332   |
| TCONS_00122029     | up   | 1.3318119  |
| TCONS_00094623     | down | -1.2577724 |
| TCONS_00016061     | up   | 1.6156716  |
| TCONS_00136841     | down | -1.1160514 |
| TCONS_00016284     | up   | 1.3929918  |
| TCONS_00106619     | up   | 1.6582379  |
| XR_146922.1        | up   | 3.9139977  |
| TCONS_00098087     | down | -3.148664  |
| ENSRNOT00000010055 | down | -1.6474991 |
| TCONS_00130455     | up   | 1.652122   |
| TCONS_00049878     | up   | 1.8785882  |
| XR_146767.1        | down | -1.0105147 |
| TCONS_00069554     | up   | 1.92903    |
| TCONS_00103389     | down | -1.2552128 |
| TCONS_00124124     | down | -2.0876157 |
| uc.292+            | up   | 1.8264241  |
| ENSRNOT00000071753 | up   | 1.3914597  |
| TCONS_00015137     | down | -1.5272074 |
| ENSRNOT00000071711 | up   | 2.5113647  |
| TCONS_00098426     | up   | 1.0257583  |
| TCONS_00037322     | down | -1.8232889 |

|                    |      |            |
|--------------------|------|------------|
| TCONS_00074781     | up   | 1.0090675  |
| TCONS_00088560     | down | -1.8692844 |
| TCONS_00028054     | up   | 1.4523861  |
| TCONS_00121611     | up   | 1.7711949  |
| TCONS_00066075     | up   | 1.7211008  |
| TCONS_00066949     | up   | 2.9280858  |
| XR_145819.1        | down | -1.4759793 |
| ENSRNOT00000072461 | up   | 1.0748196  |
| ENSRNOT00000041259 | up   | 1.0995474  |
| TCONS_00111245     | up   | 2.5709667  |
| uc.42+             | up   | 1.6633888  |
| ENSRNOT00000034353 | up   | 1.0658464  |
| XR_145922.1        | down | -1.01172   |
| TCONS_00050300     | up   | 1.2016009  |
| TCONS_00031631     | down | -1.1417003 |
| TCONS_00039015     | down | -1.1552138 |
| TCONS_00079248     | up   | 2.931118   |
| TCONS_00089952     | down | -2.474569  |
| XR_146484.1        | up   | 1.3460798  |
| TCONS_00090858     | up   | 1.5364623  |
| TCONS_00084902     | down | -1.7792058 |
| TCONS_00000181     | down | -1.5879747 |
| TCONS_00097289     | up   | 3.702619   |
| uc.31+             | up   | 2.4810514  |
| XR_146626.1        | up   | 1.6026235  |
| TCONS_00041058     | up   | 1.0116591  |
| XR_146466.1        | up   | 1.0948081  |
| TCONS_00097235     | down | -1.2958086 |
| TCONS_00140028     | down | -1.2640522 |
| TCONS_00032538     | down | -1.2963591 |
| XR_145988.1        | up   | 1.8006124  |
| TCONS_00116833     | up   | 2.1211467  |
| TCONS_00089252     | down | -3.0666008 |
| ENSRNOT00000075618 | up   | 1.5381951  |
| ENSRNOT00000015527 | up   | 2.8348637  |
| TCONS_00104134     | down | -1.9695306 |
| TCONS_00090091     | up   | 1.2975705  |
| TCONS_00074667     | up   | 4.6097045  |
| TCONS_00028522     | up   | 1.2456117  |
| TCONS_00079432     | down | -3.0905645 |
| TCONS_00017249     | down | -1.1984868 |
| TCONS_00017968     | up   | 4.1441097  |
| TCONS_00095303     | up   | 1.0688605  |
| XR_146016.1        | up   | 1.6337395  |
| uc.353+            | up   | 1.4879248  |
| uc.431+            | up   | 1.1316113  |
| TCONS_00074424     | down | -1.7498064 |
| TCONS_00006127     | up   | 1.2358768  |
| ENSRNOT00000074675 | up   | 1.8213387  |
| TCONS_00049832     | down | -1.147605  |
| TCONS_00064427     | up   | 1.4088326  |
| ENSRNOT00000029810 | down | -3.0341077 |
| TCONS_00074891     | up   | 1.011117   |
| TCONS_00129211     | up   | 1.0363054  |
| XR_146021.1        | down | -1.2115016 |
| TCONS_00011976     | down | -1.487585  |

|                    |      |            |
|--------------------|------|------------|
| TCONS_00074835     | up   | 3.2416146  |
| TCONS_00138733     | down | -1.6140523 |
| TCONS_00122318     | down | -1.0327945 |
| TCONS_00135127     | down | -1.1911716 |
| TCONS_00102300     | up   | 1.1450433  |
| TCONS_00134482     | up   | 1.6983867  |
| TCONS_00127096     | down | -1.2306335 |
| XR_146941.1        | up   | 1.2487993  |
| TCONS_00008607     | up   | 1.1111459  |
| uc.390+            | down | -1.0569468 |
| XR_146776.1        | up   | 3.0754843  |
| XR_146856.1        | up   | 1.5920362  |
| TCONS_00135208     | down | -1.0912127 |
| TCONS_00054573     | down | -1.170805  |
| TCONS_00075033     | up   | 1.1454086  |
| TCONS_00031644     | down | -1.0823038 |
| TCONS_00089955     | down | -2.3627253 |
| TCONS_00059395     | down | -1.3865427 |
| TCONS_00128446     | up   | 1.5384941  |
| ENSRNOT00000074581 | up   | 1.7929575  |
| TCONS_00062646     | down | -1.1032175 |
| uc.219+            | down | -1.3731334 |
| TCONS_00023664     | down | -2.075711  |
| TCONS_00031798     | up   | 2.4192224  |
| TCONS_00122103     | down | -1.1879485 |
| TCONS_00122041     | down | -1.4389472 |
| TCONS_00016561     | up   | 1.3106651  |
| TCONS_00055539     | up   | 2.1500902  |
| ENSRNOT00000013677 | down | -1.1589522 |
| XR_086201.1        | down | -1.1738853 |
| XR_086002.2        | down | -1.6914282 |
| TCONS_00113623     | down | -2.9513414 |
| TCONS_00097745     | up   | 1.0022826  |
| TCONS_00097314     | down | -1.2008629 |
| XR_085567.2        | up   | 1.4269907  |
| TCONS_00079427     | up   | 1.0425618  |
| TCONS_00121852     | down | -1.9864216 |
| TCONS_00072562     | down | -2.4716396 |
| TCONS_00078859     | down | -1.643004  |
| TCONS_00086856     | up   | 1.0265524  |
| TCONS_00027858     | down | -1.7952428 |
| TCONS_00095242     | up   | 1.31318    |
| XR_007140.3        | up   | 1.2575469  |
| XR_085895.2        | down | -2.3172264 |
| XR_146018.1        | down | -1.1008866 |
| ENSRNOT00000051656 | down | -1.1274309 |
| TCONS_00054496     | down | -1.8836927 |
| TCONS_00113471     | down | -2.9619153 |
| TCONS_00010538     | up   | 1.7946676  |
| TCONS_00097526     | down | -2.3751996 |
| TCONS_00049780     | down | -1.6315639 |
| TCONS_00074208     | up   | 1.2534475  |
| TCONS_00113649     | up   | 2.1153917  |
| TCONS_00089047     | down | -2.9313602 |
| TCONS_00045349     | up   | 1.1165781  |
| TCONS_00062403     | up   | 4.771412   |

|                    |      |            |
|--------------------|------|------------|
| TCONS_00108557     | down | -3.1992736 |
| XR_146050.1        | down | -4.8647957 |
| ENSRNOT00000074188 | down | -1.5277376 |
| TCONS_00023231     | up   | 4.358521   |
| TCONS_00062691     | down | -1.6210012 |
| TCONS_00135610     | up   | 1.2250953  |
| TCONS_00112937     | down | -1.1168833 |
| XR_146511.1        | up   | 1.8847728  |
| ENSRNOT00000072283 | up   | 1.6727295  |
| TCONS_00058669     | up   | 3.4630365  |
| TCONS_00074605     | up   | 1.1399293  |
| TCONS_00122294     | down | -2.615778  |
| TCONS_00058879     | up   | 3.4226532  |
| ENSRNOT00000030707 | up   | 1.1959758  |
| TCONS_00122444     | down | -1.5495718 |
| TCONS_00134930     | up   | 2.3102436  |
| TCONS_00109082     | down | -1.7718399 |
| TCONS_00055007     | down | -1.3468447 |
| TCONS_00016118     | up   | 1.088007   |
| TCONS_00083704     | down | -1.2760153 |
| TCONS_00133961     | down | -1.2638545 |
| TCONS_00076398     | down | -2.0672088 |
| XR_146632.1        | up   | 1.6420178  |
| TCONS_00113762     | up   | 1.2353597  |
| TCONS_00050846     | down | -1.3021111 |
| TCONS_00045076     | up   | 1.5616066  |
| ENSRNOT00000047102 | up   | 1.2227144  |
| TCONS_00103699     | up   | 1.0109606  |
| TCONS_00074954     | up   | 1.0116572  |
| TCONS_00062444     | down | -1.5984888 |
| TCONS_00027400     | down | -2.8872662 |
| TCONS_00127945     | up   | 1.6081853  |
| TCONS_00007423     | down | -1.2632606 |
| TCONS_00066322     | down | -1.2243726 |
| TCONS_00068040     | down | -1.4367993 |
| TCONS_00135298     | up   | 1.2280433  |
| FR146672           | up   | 1.8758407  |
| ENSRNOT00000002894 | down | -1.1516948 |
| TCONS_00016536     | down | -1.5199809 |
| TCONS_00111564     | up   | 1.2601187  |
| TCONS_00058252     | down | -1.696176  |
| XR_145741.1        | down | -1.0841875 |
| XR_145900.1        | up   | 1.1829891  |
| TCONS_00106613     | up   | 1.0988183  |
| ENSRNOT00000066358 | down | -1.2547512 |
| TCONS_00017012     | up   | 1.5328624  |
| uc.226+            | down | -1.443666  |
| TCONS_00097517     | down | -2.9403853 |
| ENSRNOT00000055436 | up   | 2.585516   |
| TCONS_00010714     | up   | 1.4297764  |
| XR_145910.1        | up   | 1.044651   |
| TCONS_00136403     | up   | 1.7331762  |
| TCONS_00140116     | down | -1.8973191 |
| XR_147157.1        | up   | 1.6422348  |
| TCONS_00089908     | down | -3.40792   |
| TCONS_00045827     | up   | 1.2752233  |

|                    |      |            |
|--------------------|------|------------|
| XR_146164.1        | up   | 1.1727247  |
| ENSRNOT00000059557 | down | -3.4375436 |
| TCONS_00036342     | up   | 1.4207678  |
| TCONS_00107298     | up   | 1.9660926  |
| XR_146133.1        | up   | 1.0148077  |
| TCONS_00097512     | down | -2.5421064 |
| ENSRNOT00000074126 | up   | 1.4798489  |
| TCONS_00045072     | up   | 1.5164266  |
| TCONS_00111969     | down | -1.1714072 |
| XR_146472.1        | down | -1.2615814 |
| XR_146139.1        | down | -1.291235  |
| TCONS_00017271     | up   | 1.761796   |
| TCONS_00035992     | down | -1.7662177 |
| ENSRNOT00000075246 | up   | 1.6146727  |
| XR_147070.1        | up   | 1.1948304  |
| TCONS_00061948     | up   | 2.7115273  |
| TCONS_00036664     | down | -2.8859663 |
| TCONS_00059338     | up   | 1.3775766  |
| TCONS_00135198     | up   | 4.6157875  |
| TCONS_00054258     | down | -1.6964917 |
| TCONS_00032006     | down | -1.138227  |
| TCONS_00129756     | up   | 1.1928782  |
| ENSRNOT00000073020 | down | -1.5041947 |
| TCONS_00075536     | down | -2.2657316 |
| XR_146595.1        | up   | 1.0787988  |
| TCONS_00074471     | down | -2.8700325 |
| TCONS_00131457     | up   | 3.1486316  |
| TCONS_00045070     | up   | 1.7335024  |
| TCONS_00061480     | down | -1.6048812 |
| TCONS_00130363     | down | -1.1876147 |
| TCONS_00135369     | down | -2.8782537 |
| TCONS_00097520     | down | -3.1696086 |
| TCONS_00056710     | down | -3.023777  |
| TCONS_00122055     | up   | 1.8410506  |
| XR_146165.1        | up   | 2.896917   |
| XR_146240.1        | up   | 1.4920588  |
| ENSRNOT00000017200 | up   | 1.8180413  |
| TCONS_00015220     | down | -2.3287485 |
| TCONS_00015773     | down | -1.5478662 |
| TCONS_00045364     | up   | 1.5971231  |
| TCONS_00034371     | up   | 1.0754745  |
| uc.388+            | down | -1.0770857 |
| TCONS_00129921     | down | -1.365633  |
| uc.406+            | down | -2.0781255 |
| TCONS_00106588     | up   | 3.4462066  |
| TCONS_00089629     | up   | 1.5994358  |
| TCONS_00041450     | up   | 1.0678425  |
| TCONS_00121361     | up   | 1.3807554  |
| TCONS_00122123     | down | -1.0119615 |
| TCONS_00077647     | down | -1.1542912 |
| ENSRNOT00000071845 | up   | 1.2643163  |
| TCONS_00014872     | down | -1.2102928 |
| ENSRNOT00000073949 | down | -2.0097249 |
| TCONS_00074960     | up   | 2.508038   |
| XR_147151.1        | up   | 1.4493408  |
| ENSRNOT00000074812 | up   | 1.0413854  |



|                    |      |            |
|--------------------|------|------------|
| TCONS_00048388     | up   | 1.692642   |
| XR_145767.1        | down | -1.2764707 |
| TCONS_00075759     | up   | 1.0786524  |
| TCONS_00045077     | up   | 1.8995786  |
| TCONS_00132173     | up   | 1.0943937  |
| TCONS_00054626     | down | -1.6149077 |
| TCONS_00045633     | up   | 1.4242473  |
| TCONS_00027396     | down | -1.6131907 |
| TCONS_00015980     | up   | 1.9615755  |
| TCONS_00027802     | up   | 1.9957314  |
| NR_102351.1        | down | -1.9677615 |
| TCONS_00129477     | up   | 1.607233   |
| TCONS_00089988     | up   | 3.550687   |
| TCONS_00089611     | up   | 1.2069621  |
| ENSRNOT00000008849 | down | -1.0722342 |
| TCONS_00096784     | down | -1.7332852 |
| TCONS_00073487     | up   | 2.2210677  |
| TCONS_00020191     | down | -1.6627979 |
| TCONS_00046990     | down | -1.1695104 |
| TCONS_00121754     | down | -1.1405096 |
| TCONS_00113703     | up   | 2.6261961  |
| TCONS_00016559     | down | -1.4982214 |
| TCONS_00066247     | up   | 1.5427701  |
| TCONS_00015983     | up   | 1.2656145  |
| TCONS_00125733     | up   | 3.161799   |
| TCONS_00027933     | up   | 1.8503304  |
| TCONS_00080782     | down | -1.8181725 |
| TCONS_00129616     | up   | 2.4870527  |
| TCONS_00054252     | down | -2.0075972 |
| TCONS_00134744     | up   | 1.4124703  |
| NR_002151.1        | down | -1.5724962 |
| TCONS_00061070     | down | -1.144737  |
| uc.88+             | up   | 1.735116   |
| TCONS_00045766     | up   | 1.1001363  |
| TCONS_00118048     | down | -1.1480206 |
| XR_085737.1        | down | -1.0111732 |
| ENSRNOT00000032582 | up   | 1.0194192  |
| TCONS_00027776     | up   | 1.4404485  |
| XR_147149.1        | up   | 1.4026623  |
| TCONS_00088275     | down | -1.6553979 |
| uc.274+            | down | -1.4895626 |
| uc.121+            | down | -1.0679293 |
| TCONS_00091051     | up   | 1.175318   |
| TCONS_00097560     | down | -2.7037935 |
| XR_145824.1        | up   | 1.785707   |
| TCONS_00045182     | down | -1.2839031 |
| XR_146469.1        | up   | 1.4224281  |
| ENSRNOT00000075806 | up   | 1.1983166  |
| ENSRNOT00000031937 | down | -1.3030627 |
| TCONS_00045338     | up   | 1.0582638  |
| ENSRNOT00000073515 | up   | 2.5156994  |
| uc.264+            | down | -1.1705644 |
| TCONS_00106320     | down | -2.0784974 |
| XR_086050.3        | down | -1.6397691 |
| TCONS_00094600     | up   | 1.1228371  |
| TCONS_00113617     | down | -1.4798002 |

|                    |      |            |
|--------------------|------|------------|
| TCONS_00017320     | up   | 1.1844301  |
| TCONS_00098083     | down | -2.6745498 |
| TCONS_00027833     | up   | 1.4335012  |
| TCONS_00113076     | up   | 1.6947834  |
| TCONS_00094521     | down | -2.650557  |
| TCONS_00135410     | up   | 1.1938845  |
| XR_085832.2        | down | -1.4888444 |
| NR_102353.1        | down | -2.9678822 |
| uc.89+             | down | -2.0132055 |
| TCONS_00043473     | down | -2.3096876 |
| TCONS_00117032     | up   | 1.4953647  |
| TCONS_00036854     | up   | 1.2188597  |
| TCONS_00015566     | up   | 1.6193609  |
| ENSRNOT00000074334 | up   | 1.1598234  |
| XR_146542.1        | down | -1.4871936 |
| TCONS_00010838     | up   | 1.8181785  |
| TCONS_00135130     | down | -1.227035  |
| TCONS_00040550     | down | -2.0195167 |
| TCONS_00066611     | up   | 1.5855494  |
| TCONS_00017368     | up   | 1.102879   |
| ENSRNOT00000073915 | down | -2.72784   |
| TCONS_00129121     | down | -2.1195302 |
| ENSRNOT00000052316 | up   | 1.4695187  |
| TCONS_00111100     | down | -3.0299058 |
| TCONS_00017430     | down | -1.0486603 |
| TCONS_00056782     | down | -1.4589581 |
| TCONS_00089392     | down | -2.2675273 |
| TCONS_00074679     | down | -1.0493736 |
| TCONS_00135296     | up   | 1.0571127  |
| TCONS_00088842     | down | -1.0890722 |
| TCONS_00107533     | up   | 2.0745826  |
| ENSRNOT00000075231 | up   | 1.4374416  |
| ENSRNOT00000074880 | up   | 1.7893898  |
| TCONS_00015178     | down | -2.334804  |
| TCONS_00079382     | down | -3.382371  |
| TCONS_00062510     | down | -1.9200344 |
| TCONS_00074478     | down | -2.8583195 |
| TCONS_00036339     | down | -2.219602  |
| TCONS_00038929     | up   | 2.0278442  |
| TCONS_00027879     | up   | 2.3175204  |
| TCONS_00112791     | up   | 1.0456254  |
| TCONS_00098075     | down | -1.0827308 |
| ENSRNOT00000002330 | down | -1.0788803 |
| TCONS_00026502     | up   | 2.2847161  |
| TCONS_00107417     | down | -1.1847701 |
| TCONS_00083703     | down | -1.591146  |
| TCONS_00129950     | up   | 1.0171795  |
| TCONS_00017327     | up   | 1.5448592  |
| uc.34+             | down | -1.3829982 |
| TCONS_00054868     | up   | 1.8338547  |
| ENSRNOT00000034194 | up   | 1.2064562  |
| TCONS_00050330     | up   | 1.0820036  |
| TCONS_00017044     | down | -2.4550843 |
| TCONS_00026705     | up   | 1.084435   |
| uc.443+            | down | -1.3357465 |
| uc.184+            | up   | 1.6052771  |

|                    |      |            |
|--------------------|------|------------|
| TCONS_00031823     | up   | 1.4175987  |
| TCONS_00045369     | up   | 1.7847686  |
| TCONS_00122094     | up   | 4.0812535  |
| ENSRNOT00000074914 | up   | 1.0796278  |
| TCONS_00098230     | up   | 5.0796247  |
| TCONS_00045702     | up   | 1.0511236  |
| ENSRNOT00000072932 | up   | 1.3818583  |
| TCONS_00036408     | up   | 1.1896996  |
| TCONS_00024937     | down | -1.4226394 |
| TCONS_00113647     | up   | 1.5454597  |
| TCONS_00039617     | up   | 1.4602075  |
| TCONS_00041037     | up   | 1.7264018  |
| XR_147186.1        | down | -1.4144983 |
| XR_086340.1        | down | -1.012866  |
| TCONS_00056240     | up   | 1.0060148  |
| TCONS_00052829     | down | -1.4135733 |
| XR_146324.1        | up   | 1.3349075  |
| TCONS_00027226     | up   | 1.0125561  |
| TCONS_00059060     | up   | 2.143015   |
| TCONS_00066467     | up   | 1.1311431  |
| TCONS_00040950     | down | -2.0111752 |
| TCONS_00015855     | down | -1.3938315 |
| TCONS_00074872     | up   | 1.7112818  |
| TCONS_00073244     | up   | 1.4454739  |
| XR_146917.1        | up   | 1.9109983  |
| TCONS_00106049     | down | -1.1576672 |
| TCONS_00082331     | down | -2.0616794 |
| TCONS_00040561     | down | -1.3377025 |
| TCONS_00027862     | down | -1.2404404 |
| uc.225+            | down | -1.6302496 |
| TCONS_00015967     | down | -1.3830769 |
| TCONS_00008900     | up   | 2.0075073  |
| TCONS_00120428     | down | -1.0714712 |
| TCONS_00112867     | up   | 2.2500792  |
| XR_085646.2        | up   | 1.0257387  |
| TCONS_00066437     | down | -1.2139006 |
| XR_146431.1        | up   | 1.358067   |
| ENSRNOT00000023629 | up   | 1.8892231  |
| TCONS_00089473     | up   | 1.1417513  |
| ENSRNOT00000040395 | down | -1.4723749 |
| TCONS_00043934     | up   | 1.1335697  |
| ENSRNOT00000075278 | up   | 1.5311823  |
| ENSRNOT00000071072 | up   | 1.6217237  |
| TCONS_00080179     | up   | 1.6802505  |
| ENSRNOT00000045891 | down | -1.1506312 |
| TCONS_00030660     | up   | 1.0421364  |
| TCONS_00096758     | down | -1.0100703 |
| TCONS_00036400     | up   | 1.7949033  |
| TCONS_00098088     | down | -1.6201406 |
| TCONS_00088941     | down | -1.559155  |
| TCONS_00035955     | up   | 1.229065   |
| TCONS_00087317     | down | -1.0965648 |
| ENSRNOT00000030033 | down | -1.6659021 |
| TCONS_00125881     | up   | 1.7847881  |
| TCONS_00135056     | up   | 1.5788617  |
| TCONS_00097310     | down | -2.383473  |

|                    |      |            |
|--------------------|------|------------|
| TCONS_00075182     | up   | 1.7104104  |
| ENSRNOT00000030916 | down | -1.1392403 |
| TCONS_00027325     | up   | 1.6347299  |
| ENSRNOT00000055314 | up   | 1.8490276  |
| TCONS_00075087     | up   | 1.3874583  |
| ENSRNOT00000073803 | down | -1.7221521 |
| TCONS_00135397     | up   | 2.4997468  |
| XR_146927.1        | up   | 1.5813308  |
| XR_085633.1        | down | -2.2893243 |
| TCONS_00095611     | down | -1.23598   |
| TCONS_00027394     | down | -1.9072201 |
| XR_009634.2        | down | -1.3104758 |
| ENSRNOT00000035499 | down | -1.3845453 |
| TCONS_00107419     | down | -1.2843585 |
| TCONS_00075519     | down | -1.4185898 |
| XR_146227.1        | down | -2.3952937 |
| TCONS_00066375     | down | -1.0164948 |
| TCONS_00071072     | down | -1.4892943 |
| TCONS_00135399     | up   | 1.0389881  |
| TCONS_00118546     | up   | 2.033505   |
| TCONS_00040469     | up   | 1.6495881  |
| XR_145963.1        | up   | 1.1517296  |
| TCONS_00140065     | up   | 1.3408794  |
| TCONS_00059149     | down | -2.1611633 |
| TCONS_00091028     | down | -1.4696622 |
| TCONS_00130169     | up   | 1.4450572  |
| TCONS_00129658     | down | -1.6361854 |
| TCONS_00027277     | up   | 1.2224774  |
| TCONS_00040463     | down | -1.0684271 |
| TCONS_00034399     | up   | 1.1935425  |
| TCONS_00056527     | up   | 1.0012374  |
| TCONS_00040785     | down | -1.8445566 |
| TCONS_00089550     | up   | 2.0443244  |
| TCONS_00032379     | down | -1.2959926 |
| XR_146631.1        | down | -2.133953  |
| XR_147145.1        | up   | 1.5740857  |
| TCONS_00071617     | down | -1.8345456 |
| TCONS_00129925     | down | -1.4053826 |
| TCONS_00121347     | up   | 1.3944435  |
| TCONS_00054436     | up   | 1.328054   |
| TCONS_00040601     | up   | 1.1508708  |
| ENSRNOT00000031839 | up   | 1.7883067  |
| ENSRNOT00000044694 | up   | 1.9909797  |
| ENSRNOT00000007699 | down | -1.6185102 |
| TCONS_00033322     | down | -1.7032738 |
| TCONS_00031509     | down | -1.6598978 |
| TCONS_00062199     | down | -1.6604855 |
| TCONS_00050176     | up   | 1.4585471  |
| TCONS_00062716     | up   | 1.1993465  |
| TCONS_00089053     | up   | 1.2194257  |
| TCONS_00065430     | down | -1.6058564 |
| TCONS_00028222     | down | -2.2064414 |
| TCONS_00006559     | up   | 1.0299559  |
| TCONS_00062153     | up   | 1.5839157  |
| uc.411+            | down | -1.0115054 |
| TCONS_00014999     | down | -3.6441016 |

|                    |      |            |
|--------------------|------|------------|
| TCONS_00027184     | down | -1.0651567 |
| TCONS_00024581     | up   | 1.0895934  |
| TCONS_00028529     | down | -1.316428  |
| TCONS_00083707     | down | -1.7165697 |
| uc.365+            | up   | 1.2086563  |
| TCONS_00016396     | down | -1.9980345 |
| TCONS_00045074     | up   | 1.6669755  |
| TCONS_00095543     | down | -2.0959978 |
| TCONS_00058306     | up   | 1.6231494  |
| TCONS_00088781     | up   | 1.6933613  |
| TCONS_00103856     | down | -3.003828  |
| ENSRNOT00000027660 | down | -1.916482  |
| ENSRNOT00000039294 | down | -1.8036222 |
| TCONS_00081870     | down | -1.3245962 |
| TCONS_00075691     | up   | 3.006781   |
| TCONS_00066293     | down | -1.3689747 |
| TCONS_00059935     | up   | 1.0032635  |
| TCONS_00066250     | down | -1.646102  |
| TCONS_00059148     | down | -3.6601472 |
| TCONS_00135259     | up   | 1.4097056  |
| TCONS_00049973     | up   | 1.4565737  |
| XR_086057.1        | down | -1.6111369 |
| TCONS_00139871     | down | -1.6704817 |
| TCONS_00054629     | down | -1.2663031 |
| TCONS_00095029     | up   | 1.0352802  |
| TCONS_00036186     | down | -1.6239836 |
| ENSRNOT00000029702 | down | -1.1361508 |
| TCONS_00112764     | up   | 1.8683414  |
| TCONS_00089045     | down | -2.7972798 |
| uc.94+             | up   | 1.8624346  |
| ENSRNOT00000070799 | up   | 1.6719744  |
| TCONS_00117493     | up   | 1.2648735  |
| TCONS_00031684     | up   | 1.4882889  |
| TCONS_00116182     | up   | 2.1077092  |
| TCONS_00082285     | down | -4.6552973 |
| TCONS_00074196     | up   | 1.2716074  |
| ENSRNOT00000043630 | down | -1.5599394 |
| uc.113+            | up   | 3.4603782  |
| TCONS_00079198     | down | -1.1609206 |
| TCONS_00045098     | down | -1.6068159 |
| TCONS_00045432     | up   | 1.7460003  |
| TCONS_00079339     | down | -1.1547258 |
| uc.203+            | down | -1.050147  |
| TCONS_00075742     | up   | 2.1848907  |
| TCONS_00074953     | up   | 1.8768532  |
| TCONS_00070506     | up   | 1.0322461  |
| TCONS_00015468     | down | -1.1052895 |
| uc.138+            | up   | 1.4544897  |
| TCONS_00122346     | up   | 1.3293753  |
| TCONS_00077817     | up   | 5.4489107  |
| TCONS_00041064     | up   | 1.0263331  |
| XR_145930.1        | down | -2.1006413 |
| TCONS_00049848     | up   | 1.2046232  |
| TCONS_00108257     | up   | 1.4258962  |
| TCONS_00122237     | up   | 1.4265752  |
| XR_146115.1        | down | -1.0174289 |

|                    |      |            |
|--------------------|------|------------|
| TCONS_00062773     | up   | 2.9541512  |
| TCONS_00129612     | up   | 1.260293   |
| TCONS_00061732     | up   | 1.2986755  |
| TCONS_00050162     | down | -1.5066109 |
| TCONS_00104044     | down | -1.726277  |
| TCONS_00075065     | up   | 1.0855923  |
| TCONS_00134323     | up   | 1.1828029  |
| ENSRNOT00000074779 | down | -1.2482519 |
| TCONS_00041063     | up   | 1.3712134  |
| XR_146718.1        | up   | 1.6665149  |
| TCONS_00053245     | up   | 1.4575589  |
| TCONS_00077554     | down | -1.0755951 |
| uc.477+            | up   | 1.5686979  |
| TCONS_00090885     | up   | 1.629096   |
| TCONS_00060459     | down | -2.0617168 |
| TCONS_00115519     | up   | 1.0972579  |
| ENSRNOT00000071347 | up   | 1.2741091  |
| TCONS_00054403     | up   | 1.7063432  |
| TCONS_00034803     | up   | 1.0663705  |
| TCONS_00084895     | down | -1.3199811 |
| XR_146702.1        | up   | 1.0437746  |
| TCONS_00101828     | up   | 1.3356047  |
| TCONS_00089250     | down | -2.783198  |
| TCONS_00042649     | up   | 1.0651715  |
| TCONS_00012526     | up   | 1.4237235  |
| TCONS_00113312     | down | -1.4792073 |
| TCONS_00045366     | up   | 1.0850277  |
| ENSRNOT00000040892 | up   | 1.9866438  |
| TCONS_00035910     | up   | 1.0056038  |
| TCONS_00020190     | down | -1.7314727 |
| ENSRNOT00000058957 | up   | 3.0367174  |
| TCONS_00070514     | up   | 1.2921252  |
| TCONS_00009008     | up   | 2.5498688  |
| TCONS_00106420     | down | -1.8510108 |
| TCONS_00054326     | down | -1.0588989 |
| TCONS_00017266     | up   | 1.2199407  |
| uc.317+            | down | -2.8869033 |
| ENSRNOT00000072038 | up   | 1.7404091  |
| TCONS_00135406     | up   | 1.0625575  |
| TCONS_00122315     | up   | 1.0488539  |
| TCONS_00043925     | up   | 1.231813   |
| TCONS_00121572     | down | -1.5051465 |
| TCONS_00089576     | up   | 1.6556983  |
| TCONS_00028321     | down | -1.8843043 |
| TCONS_00050032     | up   | 1.7251127  |
| ENSRNOT00000075140 | up   | 1.5603349  |
| TCONS_00061344     | down | -3.4144893 |
| TCONS_00077367     | up   | 2.881259   |
| TCONS_00015918     | up   | 1.3883753  |
| XR_146066.1        | up   | 1.0650244  |
| TCONS_00111673     | up   | 1.1420684  |
| TCONS_00059216     | up   | 1.8686962  |
| ENSRNOT00000030314 | down | -1.2832899 |
| TCONS_00101871     | up   | 1.4768167  |
| TCONS_00113636     | up   | 1.842488   |
| TCONS_00000925     | down | -1.642142  |

|                    |      |            |
|--------------------|------|------------|
| ENSRNOT00000011831 | up   | 1.3230348  |
| TCONS_00079297     | down | -1.7005739 |
| TCONS_00037323     | down | -1.7966205 |
| TCONS_00000182     | down | -2.3238425 |
| TCONS_00057642     | down | -1.3448563 |
| TCONS_00027847     | up   | 1.057962   |
| TCONS_00039288     | up   | 1.4650071  |
| ENSRNOT00000075023 | up   | 2.2485847  |
| TCONS_00118798     | down | -1.6985922 |
| TCONS_00016884     | down | -1.0278072 |
| TCONS_00100075     | down | -1.8243198 |
| TCONS_00043391     | down | -1.4019976 |
| XR_146172.1        | down | -1.6937065 |
| uc.246+            | down | -1.7084179 |
| XR_146556.1        | down | -4.772669  |
| XR_146924.1        | down | -1.908298  |
| TCONS_00077641     | down | -1.2767816 |
| XR_145822.1        | up   | 1.3773069  |
| TCONS_00027786     | up   | 2.0985973  |
| TCONS_00054415     | down | -2.5102866 |
| TCONS_00040140     | up   | 1.4669738  |
| TCONS_00134669     | up   | 1.3210077  |
| TCONS_00036273     | down | -1.7259804 |
| TCONS_00027687     | down | -1.5631998 |
| TCONS_00027900     | up   | 1.0797839  |
| TCONS_00040457     | down | -1.5559964 |
| TCONS_00050115     | down | -1.3000066 |
| TCONS_00132704     | up   | 1.7178569  |
| TCONS_00021783     | up   | 1.5938263  |
| TCONS_00017022     | up   | 1.3667068  |
| TCONS_00054034     | up   | 1.2256992  |
| TCONS_00069972     | up   | 1.0325289  |
| TCONS_00036246     | up   | 4.5043354  |
| TCONS_00053451     | down | -1.7120857 |
| TCONS_00035663     | up   | 1.378463   |
| TCONS_00049301     | up   | 2.8502922  |
| TCONS_00040842     | down | -1.1652358 |
| TCONS_00017490     | down | -2.1280353 |
| TCONS_00062687     | up   | 3.1500292  |
| TCONS_00075521     | down | -2.120368  |
| TCONS_00053182     | up   | 1.0231657  |
| TCONS_00124486     | down | -2.023255  |
| XR_085881.1        | down | -2.3756473 |
| TCONS_00028225     | down | -1.3486156 |
| TCONS_00115296     | down | -1.4479442 |
| TCONS_00081189     | down | -1.2637033 |
| TCONS_00043127     | up   | 1.5463586  |
| TCONS_00034261     | down | -2.674329  |
| XR_146730.1        | up   | 1.2646332  |
| ENSRNOT00000041969 | up   | 1.9741745  |
| TCONS_00083706     | up   | 1.2818551  |
| TCONS_00097492     | down | -1.4752064 |
| TCONS_00023117     | up   | 1.289319   |
| TCONS_00030492     | up   | 2.7620564  |
| TCONS_00079429     | down | -2.8789434 |
| TCONS_00079157     | up   | 1.0141823  |

|                    |      |            |
|--------------------|------|------------|
| uc.326+            | up   | 2.8649836  |
| TCONS_00125586     | up   | 1.345029   |
| XR_145755.1        | up   | 1.7027626  |
| TCONS_00027742     | down | -1.1582422 |
| TCONS_00011195     | down | -2.2114103 |
| TCONS_00015375     | down | -1.2262112 |
| TCONS_00015842     | down | -1.987734  |
| TCONS_00088176     | up   | 1.4629527  |
| TCONS_00001294     | down | -1.0470371 |
| XR_145927.1        | down | -1.8895632 |
| TCONS_00107060     | up   | 1.1393125  |
| TCONS_00088859     | down | -2.4635348 |
| ENSRNOT00000035482 | down | -2.0329676 |
| XR_146645.1        | up   | 1.1100683  |
| NR_037614.1        | down | -2.119322  |
| TCONS_00075784     | up   | 1.4744585  |
| ENSRNOT00000073095 | up   | 1.6116495  |
| uc.323+            | down | -1.6004685 |
| TCONS_00118800     | up   | 1.400718   |
| TCONS_00010544     | up   | 1.3991442  |
| TCONS_00113268     | up   | 1.0580869  |
| TCONS_00016395     | down | -3.1866703 |
| TCONS_00129392     | up   | 1.2298727  |
| TCONS_00045675     | down | -1.743     |
| TCONS_00003049     | down | -1.7924833 |
| TCONS_00093592     | up   | 1.5101528  |
| ENSRNOT00000039834 | up   | 1.7212138  |
| TCONS_00033383     | down | -1.2693753 |
| TCONS_00076647     | up   | 1.3620735  |
| TCONS_00018254     | up   | 2.2267747  |
| TCONS_00129843     | down | -1.5725632 |
| ENSRNOT00000039482 | up   | 1.9599395  |
| ENSRNOT00000072545 | up   | 2.7108445  |
| TCONS_00017240     | up   | 1.1561046  |
| TCONS_00054042     | down | -1.4040301 |
| ENSRNOT00000072687 | down | -2.1832862 |
| TCONS_00086610     | down | -1.9432883 |
| TCONS_00040722     | up   | 2.8606057  |
| TCONS_00062827     | down | -1.2503009 |
| TCONS_00050001     | up   | 2.0490983  |
| TCONS_00089820     | down | -2.0465086 |
| XR_147059.1        | up   | 1.4702024  |
| TCONS_00074202     | up   | 1.2882442  |
| TCONS_00027839     | down | -1.526087  |
| TCONS_00089001     | down | -1.8828566 |
| TCONS_00074308     | up   | 1.0471618  |
| XR_146570.1        | down | -1.3354561 |
| XR_085864.2        | up   | 1.1484308  |
| TCONS_00126614     | down | -1.424789  |
| TCONS_00121401     | down | -1.1014044 |
| TCONS_00089033     | up   | 2.1323404  |
| XR_146954.1        | down | -2.5443473 |
| TCONS_00010749     | down | -2.4955044 |
| TCONS_00140194     | up   | 1.201488   |
| TCONS_00134998     | up   | 1.5446558  |
| TCONS_00002958     | down | -1.261132  |



|                    |      |            |
|--------------------|------|------------|
| NR_073588.1        | down | -4.757705  |
| TCONS_00089832     | up   | 3.9223976  |
| TCONS_00076086     | up   | 1.2485552  |
| TCONS_00069836     | down | -3.6751385 |
| TCONS_00075703     | down | -3.1897867 |
| ENSRNOT00000058869 | down | -1.2552185 |
| TCONS_00081069     | down | -1.5932021 |
| XR_146332.1        | up   | 1.2133579  |
| TCONS_00081218     | up   | 2.774043   |
| XR_146549.1        | down | -2.3826637 |
| TCONS_00058575     | up   | 2.1768522  |
| TCONS_00122111     | up   | 1.004703   |
| TCONS_00097972     | up   | 1.1945901  |
| TCONS_00115243     | up   | 1.0211911  |
| TCONS_00059840     | down | -1.1006889 |
| ENSRNOT00000003363 | up   | 1.450944   |
| TCONS_00071871     | up   | 2.9087906  |
| TCONS_00074205     | up   | 1.2297826  |
| XR_146142.1        | up   | 1.7299304  |
| ENSRNOT00000067148 | up   | 1.3672361  |
| XR_085782.1        | down | -2.090055  |
| TCONS_00132682     | down | -1.0804005 |
| uc.140+            | up   | 1.2767785  |
| ENSRNOT00000074078 | up   | 1.143595   |
| ENSRNOT00000073328 | up   | 1.4279485  |
| ENSRNOT00000007522 | down | -1.6768954 |
| TCONS_00098463     | up   | 1.3039248  |
| TCONS_00053075     | down | -1.5992441 |
| TCONS_00074213     | up   | 1.6236887  |
| uc.287+            | down | -1.7158315 |
| TCONS_00140049     | down | -1.9142022 |
| TCONS_00027691     | down | -1.652837  |
| TCONS_00098266     | up   | 1.6612616  |
| TCONS_00122477     | up   | 3.5175834  |
| TCONS_00135006     | up   | 1.4199362  |
| TCONS_00072324     | up   | 3.6210465  |
| TCONS_00071297     | up   | 1.6269112  |
| TCONS_00017089     | up   | 1.6590064  |
| TCONS_00017019     | down | -1.4445281 |
| ENSRNOT00000048584 | down | -1.08253   |
| TCONS_00058984     | up   | 1.4359269  |
| TCONS_00075067     | up   | 3.1408725  |
| TCONS_00041901     | up   | 1.1685624  |
| TCONS_00129647     | up   | 3.6635342  |
| TCONS_00097522     | down | -1.5147309 |
| TCONS_00129986     | down | -1.3268111 |
| TCONS_00139569     | down | -3.239974  |
| TCONS_00086542     | up   | 1.0516062  |
| XR_146482.1        | down | -1.7128558 |
| TCONS_00086981     | down | -1.0629561 |
| uc.308+            | down | -2.2647066 |
| TCONS_00107871     | down | -2.0952332 |
| XR_146500.1        | down | -1.4315286 |
| ENSRNOT00000067642 | down | -1.8668222 |
| TCONS_00125829     | up   | 5.208974   |
| TCONS_00074201     | up   | 1.1251526  |

|                    |      |            |
|--------------------|------|------------|
| TCONS_00020189     | down | -2.2164726 |
| TCONS_00021514     | up   | 1.169914   |
| uc.378+            | down | -1.198112  |
| TCONS_00075066     | up   | 1.5759163  |
| TCONS_00122387     | down | -3.0267816 |
| TCONS_00098349     | down | -1.4406059 |
| TCONS_00129579     | up   | 1.8656209  |
| NR_002597.1        | up   | 1.641674   |
| TCONS_00118046     | up   | 1.506433   |
| TCONS_00056280     | up   | 1.0125296  |
| TCONS_00122120     | down | -1.673099  |
| TCONS_00055605     | down | -1.6231096 |
| TCONS_00071889     | up   | 1.8416195  |
| ENSRNOT00000071156 | down | -1.7349901 |
| XR_146497.1        | up   | 2.2420344  |
| TCONS_00106616     | up   | 1.3220944  |
| TCONS_00110904     | down | -1.848047  |
| ENSRNOT00000013942 | down | -1.2422371 |
| TCONS_00097975     | down | -1.2044334 |
| XR_146504.1        | down | -2.4177113 |
| TCONS_00122394     | up   | 1.7452402  |
| TCONS_00048993     | up   | 1.2644196  |
| TCONS_00017479     | down | -1.8169305 |
| TCONS_00020192     | down | -1.1897082 |
| TCONS_00027224     | up   | 2.4345055  |
| TCONS_00007603     | down | -1.3765192 |
| TCONS_00087932     | down | -1.7713828 |
| TCONS_00123018     | up   | 1.3966904  |
| TCONS_00075221     | up   | 1.0893598  |
| TCONS_00035983     | up   | 1.4299169  |
| TCONS_00015447     | up   | 1.0442786  |
| XR_146592.1        | up   | 1.1541443  |
| XR_145752.1        | up   | 1.0685697  |
| NR_037674.1        | down | -1.2176962 |
| TCONS_00089296     | up   | 1.3171444  |
| TCONS_00129926     | down | -1.455689  |
| ENSRNOT00000044621 | up   | 1.9062681  |
| TCONS_00058983     | up   | 1.3816595  |
| TCONS_00129928     | up   | 4.13939    |
| TCONS_00017491     | down | -1.4745528 |
| TCONS_00129578     | up   | 1.2265105  |
| XR_146777.1        | down | -1.4900007 |
| TCONS_00098236     | up   | 1.3094299  |
| TCONS_00130083     | down | -1.7983747 |
| TCONS_00112583     | down | -1.7086681 |
| TCONS_00119074     | down | -1.1150343 |
| TCONS_00040514     | down | -1.3617193 |
| TCONS_00015835     | down | -1.6723096 |
| TCONS_00043401     | down | -1.1182148 |
| TCONS_00095582     | up   | 2.140339   |
| TCONS_00064907     | up   | 1.0892372  |
| TCONS_00129535     | up   | 3.7600596  |
| ENSRNOT00000071824 | up   | 1.4556489  |
| TCONS_00088861     | down | -1.1018122 |
| TCONS_00030407     | up   | 4.3681087  |
| TCONS_00064899     | down | -1.1810236 |

|                    |      |            |
|--------------------|------|------------|
| XR_146169.1        | up   | 1.752943   |
| TCONS_00115842     | up   | 1.156867   |
| TCONS_00129903     | up   | 2.187474   |
| TCONS_00015696     | down | -1.5992485 |
| TCONS_00077611     | up   | 1.0294874  |
| TCONS_00135256     | up   | 1.0983775  |
| XR_146189.1        | down | -1.0618939 |
| TCONS_00106795     | up   | 2.276651   |
| TCONS_00001298     | down | -1.0441809 |
| TCONS_00118462     | down | -2.563449  |
| TCONS_00130295     | up   | 3.960373   |
| TCONS_00122192     | up   | 1.0818663  |
| TCONS_00054506     | up   | 1.0836318  |
| TCONS_00050149     | up   | 3.2200408  |
| TCONS_00015427     | down | -1.3200431 |
| uc.427+            | up   | 1.023505   |
| TCONS_00006847     | up   | 1.3468795  |
| TCONS_00101709     | up   | 2.1416397  |
| TCONS_00126743     | up   | 2.189594   |
| ENSRNOT00000065447 | down | -1.279664  |
| XR_146992.1        | down | -1.6681852 |
| TCONS_00081221     | up   | 1.4310229  |
| TCONS_00107145     | down | -1.1852198 |
| TCONS_00140162     | down | -2.2225437 |
| TCONS_00049900     | up   | 2.0084155  |
| TCONS_00045708     | up   | 1.2054648  |
| TCONS_00016405     | up   | 1.602087   |
| TCONS_00059147     | down | -3.0064845 |
| TCONS_00093921     | up   | 2.1827543  |
| TCONS_00031740     | up   | 3.157536   |
| ENSRNOT00000066890 | down | -1.1372193 |
| TCONS_00135487     | down | -1.3314598 |
| TCONS_00017493     | down | -1.8735425 |
| ENSRNOT00000039637 | up   | 1.3487883  |
| uc.345+            | up   | 1.3007214  |
| TCONS_00135615     | up   | 1.0052752  |
| TCONS_00113041     | down | -1.3975933 |
| TCONS_00003028     | up   | 1.220232   |
| ENSRNOT00000041892 | down | -1.2865705 |
| TCONS_00060078     | down | -1.3812094 |
| TCONS_00089527     | down | -2.5051312 |
| TCONS_00017244     | up   | 3.3812752  |
| TCONS_00017345     | up   | 1.0879252  |
| TCONS_00106261     | up   | 1.4463825  |
| TCONS_00113632     | up   | 1.7577114  |
| ENSRNOT00000050559 | down | -1.6626406 |
| TCONS_00121334     | up   | 1.1450901  |
| uc.50+             | down | -1.0883427 |
| ENSRNOT00000004831 | down | -2.690514  |
| TCONS_00036947     | down | -1.8174394 |
| TCONS_00062289     | up   | 1.2766714  |
| TCONS_00034306     | up   | 1.0492508  |
| ENSRNOT00000071542 | down | -1.668015  |
| XR_146732.1        | down | -1.5460606 |
| TCONS_00045071     | up   | 1.6596718  |
| TCONS_00061483     | down | -2.4274    |

|                    |      |            |
|--------------------|------|------------|
| ENSRNOT00000071680 | up   | 1.8761215  |
| TCONS_00049721     | up   | 1.0289717  |
| TCONS_00106008     | down | -1.4090815 |
| ENSRNOT00000072004 | up   | 1.2040923  |
| XR_145740.1        | up   | 1.2355561  |
| XR_009207.2        | down | -1.1235113 |
| TCONS_00097546     | down | -1.147882  |
| TCONS_00131245     | up   | 1.6985998  |
| TCONS_00115368     | down | -1.20101   |
| TCONS_00027522     | up   | 1.5168276  |
| TCONS_00045361     | up   | 1.4140158  |
| TCONS_00016546     | up   | 2.4341755  |
| TCONS_00040850     | up   | 2.0274472  |
| TCONS_00122386     | down | -1.0009751 |
| TCONS_00024123     | down | -1.5791279 |
| XR_145790.1        | up   | 1.1642127  |
| XR_147150.1        | up   | 1.7501049  |
| ENSRNOT00000074522 | down | -1.2609711 |
| TCONS_00098367     | up   | 1.6228313  |
| TCONS_00017406     | down | -1.0303643 |
| TCONS_00127425     | down | -1.4386544 |
| TCONS_00106887     | down | -1.1038575 |
| TCONS_00019021     | down | -1.1048474 |
| TCONS_00135297     | up   | 1.6178753  |
| TCONS_00013381     | up   | 1.1580362  |
| XR_146948.1        | down | -1.277492  |
| TCONS_00015029     | up   | 1.8133924  |
| TCONS_00064719     | up   | 1.7040553  |
| TCONS_00089994     | up   | 1.5920897  |
| TCONS_00035090     | down | -1.1959162 |
| ENSRNOT00000028844 | down | -1.972374  |
| TCONS_00104076     | up   | 1.4257472  |
| TCONS_00105297     | down | -2.019352  |
| TCONS_00062292     | up   | 1.1316752  |
| TCONS_00036272     | down | -1.1701903 |
| TCONS_00007422     | down | -3.5538766 |
| TCONS_00036017     | up   | 1.2771039  |
| TCONS_00016640     | down | -1.1719904 |
| TCONS_00016416     | up   | 1.2269931  |
| TCONS_00030072     | up   | 1.6478634  |
| TCONS_00054786     | down | -1.9291754 |
| TCONS_00107006     | up   | 1.427499   |
| TCONS_00121345     | up   | 1.2912068  |
| TCONS_00072164     | down | -2.671527  |
| TCONS_00080813     | down | -1.1350944 |
| TCONS_00013616     | up   | 2.137673   |
| TCONS_00031894     | up   | 1.0490618  |
| TCONS_00140006     | down | -2.2850738 |
| ENSRNOT00000067415 | up   | 1.2282891  |
| TCONS_00054491     | down | -4.105006  |
| uc.117+            | up   | 1.2317605  |
| TCONS_00040462     | down | -1.781926  |
| TCONS_00018646     | up   | 1.2031229  |
| ENSRNOT00000016174 | up   | 1.6343732  |
| TCONS_00074969     | up   | 2.7483582  |
| uc.61+             | down | -1.3072739 |

|                    |      |            |
|--------------------|------|------------|
| TCONS_00128045     | up   | 1.6247864  |
| TCONS_00072557     | down | -1.394248  |
| TCONS_00075037     | up   | 1.1256309  |
| XR_146656.1        | up   | 1.9309151  |
| TCONS_00076144     | up   | 1.264998   |
| XR_086051.2        | down | -1.1412678 |
| ENSRNOT0000002990  | up   | 1.1692066  |
| TCONS_00089394     | down | -2.1174212 |
| TCONS_00013987     | up   | 2.2869697  |
| ENSRNOT00000005566 | down | -1.7268906 |
| TCONS_00079655     | up   | 1.2022631  |
| TCONS_00135576     | up   | 1.8436987  |
| XR_085644.1        | down | -2.2644615 |
| XR_145869.1        | down | -2.7847908 |
| TCONS_00066016     | up   | 2.577528   |
| TCONS_00028400     | up   | 2.5856295  |
| XR_146262.1        | down | -1.0596757 |
| TCONS_00122886     | up   | 1.0478148  |
| TCONS_00043124     | up   | 1.7006402  |
| TCONS_00058738     | up   | 1.208212   |
| TCONS_00113606     | up   | 3.6633139  |
| ENSRNOT00000031325 | up   | 1.4418757  |
| TCONS_00121470     | down | -1.2786252 |
| TCONS_00083711     | up   | 1.274564   |
| TCONS_00112870     | up   | 1.5088058  |
| ENSRNOT00000067216 | up   | 1.2915025  |
| TCONS_00075023     | up   | 1.9388573  |
| XR_147164.1        | up   | 1.8136005  |
| TCONS_00054283     | down | -1.6940336 |
| uc.414+            | up   | 1.2090049  |
| TCONS_00107028     | down | -1.1885715 |
| TCONS_00107407     | up   | 1.0616245  |
| TCONS_00080781     | down | -1.6958723 |
| TCONS_00140040     | up   | 1.1912847  |
| TCONS_00059150     | down | -2.8064752 |
| ENSRNOT00000071292 | up   | 1.6522112  |
| ENSRNOT00000037724 | up   | 1.9864092  |
| XR_146747.1        | down | -1.7017498 |
| XR_146909.1        | down | -2.0242784 |
| XR_146825.1        | down | -1.6644497 |
| TCONS_00106614     | up   | 1.3569527  |
| XR_146494.1        | up   | 2.1092505  |
| TCONS_00129867     | up   | 1.4445477  |
| TCONS_00049996     | down | -1.382051  |
| TCONS_00012198     | down | -1.8040357 |
| TCONS_00138661     | down | -1.0384326 |
| TCONS_00016100     | up   | 1.4372289  |
| TCONS_00130457     | up   | 1.9101486  |
| TCONS_00038091     | down | -1.2224231 |
| XR_085885.3        | up   | 1.5728625  |
| TCONS_00058999     | up   | 1.0430326  |
| TCONS_00123247     | down | -1.2846704 |
| TCONS_00018330     | up   | 1.2462525  |
| TCONS_00079604     | up   | 1.3968706  |
| TCONS_00114853     | up   | 1.8023801  |
| ENSRNOT00000061795 | up   | 1.3534784  |

|                    |      |            |
|--------------------|------|------------|
| TCONS_00140061     | up   | 1.4559143  |
| TCONS_00017250     | down | -1.3325999 |
| TCONS_00040588     | down | -1.4800828 |
| TCONS_00054492     | down | -4.1526227 |
| ENSRNOT00000025383 | up   | 1.1295843  |
| TCONS_00015408     | up   | 1.8155079  |
| TCONS_00040739     | up   | 1.2641618  |
| ENSRNOT00000075473 | up   | 1.5616105  |
| TCONS_00017354     | up   | 1.3397298  |
| NR_027839.1        | down | -2.8255415 |
| XR_147029.1        | down | -1.1734056 |
| TCONS_00117641     | up   | 2.0263603  |
| TCONS_00059396     | up   | 1.4954648  |
| TCONS_00088722     | down | -2.3586905 |
| TCONS_00061628     | up   | 1.7552276  |
| TCONS_00040275     | up   | 2.0020475  |
| TCONS_00027726     | down | -1.8504028 |
| TCONS_00052961     | up   | 1.2710805  |
| TCONS_00058659     | up   | 1.6001248  |
| uc.236+            | up   | 1.558449   |
| TCONS_00073904     | up   | 1.1397748  |
| XR_146527.1        | up   | 1.6055698  |
| TCONS_00016275     | up   | 1.532975   |
| TCONS_00075396     | up   | 1.0946274  |
| TCONS_00079185     | up   | 1.3180294  |
| TCONS_00062181     | up   | 2.1066318  |
| TCONS_00040562     | down | -1.4327645 |
| TCONS_00030044     | up   | 1.8136439  |
| TCONS_00054404     | down | -1.0764735 |
| ENSRNOT00000075749 | up   | 1.2762561  |
| TCONS_00088795     | up   | 1.2757607  |
| TCONS_00027222     | down | -2.5432854 |
| ENSRNOT00000074376 | up   | 1.4591231  |
| TCONS_00122470     | down | -1.0565524 |
| TCONS_00017357     | up   | 1.0460886  |
| TCONS_00015135     | down | -3.7617679 |
| TCONS_00003762     | up   | 1.1907988  |
| TCONS_00060088     | down | -1.5956187 |
| XR_145973.1        | down | -2.2381625 |
| TCONS_00085406     | down | -1.5359796 |
| XR_147152.1        | up   | 1.2441015  |
| TCONS_00075687     | up   | 2.8328362  |
| TCONS_00049795     | up   | 1.3635583  |
| ENSRNOT00000045433 | up   | 1.1333079  |
| TCONS_00095270     | up   | 1.049268   |
| TCONS_00106427     | up   | 1.2464993  |
| TCONS_00006842     | up   | 2.038836   |
| ENSRNOT00000073414 | up   | 1.4192317  |
| TCONS_00017233     | up   | 1.529418   |
| TCONS_00064314     | up   | 1.3962779  |
| TCONS_00135368     | down | -3.437738  |
| TCONS_00058978     | up   | 1.0802445  |
| TCONS_00028223     | down | -1.0387793 |
| TCONS_00107323     | up   | 1.1075397  |
| XR_145747.1        | down | -1.5403924 |
| TCONS_00058101     | down | -3.6842165 |

|                    |      |            |
|--------------------|------|------------|
| TCONS_00113469     | down | -2.4424706 |
| ENSRNOT00000013741 | up   | 2.889359   |
| TCONS_00050365     | up   | 1.2185826  |
| TCONS_00074502     | up   | 1.7503533  |
| XR_147174.1        | down | -1.5663013 |
| uc.28+             | down | -1.160449  |
| TCONS_00059146     | down | -4.742921  |
| TCONS_00122388     | up   | 3.616685   |
| TCONS_00135005     | up   | 1.7202921  |
| TCONS_00009009     | up   | 2.0779104  |
| ENSRNOT00000043984 | down | -1.0864229 |
| TCONS_00113813     | up   | 1.0800209  |
| TCONS_00064440     | up   | 3.357677   |
| uc.478+            | down | -1.441323  |
| TCONS_00016457     | up   | 1.1142955  |
| TCONS_00074856     | up   | 1.0222034  |
| TCONS_00121417     | up   | 1.1588154  |
| TCONS_00038550     | up   | 1.1998482  |
| TCONS_00140201     | up   | 1.3848643  |
| ENSRNOT00000029150 | down | -3.5563855 |
| TCONS_00106662     | up   | 1.4354663  |
| TCONS_00019211     | down | -1.6757822 |
| TCONS_00134758     | up   | 1.3369484  |
| TCONS_00068389     | up   | 1.6310515  |
| TCONS_00064078     | down | -1.2688313 |
| TCONS_00045073     | up   | 1.2289324  |
| TCONS_00100347     | up   | 2.449502   |
| XR_145813.1        | down | -1.3271437 |
| TCONS_00106828     | down | -1.1190727 |
| TCONS_00075069     | up   | 3.6767445  |
| TCONS_00079383     | down | -2.0479057 |
| XR_146700.1        | up   | 1.1264863  |
| TCONS_00064495     | down | -1.46415   |
| XR_146490.1        | down | -1.0498366 |
| ENSRNOT00000072126 | down | -2.9294028 |
| TCONS_00058998     | up   | 1.244853   |
| TCONS_00013564     | down | -1.4459767 |
| ENSRNOT00000025224 | down | -1.0230231 |
| TCONS_00066097     | up   | 1.0552306  |
| TCONS_00050404     | up   | 1.1380131  |
| NR_037147.1        | up   | 1.0777774  |
| TCONS_00016184     | up   | 1.4571021  |
| TCONS_00072964     | up   | 1.4267845  |
| TCONS_00064436     | down | -1.4002016 |
| TCONS_00113350     | up   | 2.5598328  |
| ENSRNOT00000073542 | down | -2.2451925 |
| TCONS_00025275     | down | -1.4479315 |
| TCONS_00030846     | down | -1.0947595 |
| TCONS_00040033     | down | -1.0777311 |
| TCONS_00017364     | up   | 1.2367668  |
| TCONS_00112968     | down | -2.6668386 |
| TCONS_00110995     | up   | 1.1801729  |
| ENSRNOT00000008623 | up   | 1.4318352  |
| uc.242+            | up   | 2.8109865  |
| TCONS_00027748     | down | -1.2513161 |
| TCONS_00016459     | up   | 2.9461942  |

|                    |      |            |
|--------------------|------|------------|
| TCONS_00031987     | down | -1.8193374 |
| TCONS_00064496     | down | -1.7348952 |
| TCONS_00106987     | up   | 2.0667343  |
| TCONS_00108819     | down | -2.0607123 |
| TCONS_00132891     | up   | 2.0707536  |
| TCONS_00023116     | up   | 1.1437211  |
| TCONS_00054487     | down | -1.9940925 |
| ENSRNOT00000056161 | up   | 1.5384402  |
| TCONS_00011262     | down | -3.532184  |
| TCONS_00088825     | up   | 2.1153202  |
| TCONS_00097739     | up   | 1.4121275  |
| TCONS_00075001     | up   | 2.6772902  |
| ENSRNOT00000061635 | up   | 1.2835927  |
| uc.134+            | up   | 1.0185361  |
| TCONS_00074397     | up   | 1.0730591  |
| XR_146304.1        | down | -2.7368922 |
| XR_146977.1        | down | -1.1121883 |
| TCONS_00062192     | up   | 1.128792   |
| TCONS_00034370     | up   | 1.053539   |
| TCONS_00089008     | down | -1.1994715 |
| TCONS_00040008     | up   | 3.079307   |
| TCONS_00083682     | down | -1.1501576 |
| ENSRNOT00000057111 | up   | 1.0890503  |
| TCONS_00044210     | down | -1.7742233 |
| ENSRNOT00000021852 | up   | 1.7746277  |
| TCONS_00050147     | up   | 1.125804   |
| ENSRNOT00000010275 | up   | 2.3105817  |
| TCONS_00129458     | down | -2.3427854 |
| TCONS_00045343     | up   | 1.2751007  |
| ENSRNOT00000050986 | up   | 1.024888   |
| TCONS_00045368     | up   | 1.3414173  |
| TCONS_00060074     | down | -1.7623549 |
| TCONS_00040436     | down | -1.6457949 |
| TCONS_00079117     | up   | 3.7474022  |
| TCONS_00079434     | down | -3.183881  |
| TCONS_00040351     | up   | 1.5218592  |
| ENSRNOT00000043882 | up   | 1.2761455  |
| TCONS_00075702     | down | -2.561586  |
| TCONS_00017473     | up   | 2.3050914  |
| TCONS_00058812     | up   | 1.1516534  |
| uc.479+            | down | -1.0630312 |
| TCONS_00059660     | down | -1.9061754 |
| XR_146153.1        | down | -3.5422366 |
| TCONS_00066411     | up   | 1.1581244  |
| TCONS_00052486     | down | -1.2698395 |
| uc.185+            | down | -1.1333125 |
| TCONS_00045348     | up   | 1.4749875  |
| TCONS_00040600     | up   | 1.3017054  |
| ENSRNOT00000075631 | down | -1.6429901 |
| ENSRNOT00000073640 | up   | 1.3510208  |
| uc.151+            | down | -1.5868711 |
| ENSRNOT00000029099 | down | -1.1339025 |
| TCONS_00072069     | up   | 1.2462215  |
| TCONS_00132706     | down | -1.1045694 |
| TCONS_00002039     | down | -1.0012071 |
| XR_146112.1        | up   | 2.4414096  |



|                    |      |            |
|--------------------|------|------------|
| XR_145939.1        | down | -1.1811209 |
| ENSRNOT00000039245 | up   | 1.2614226  |
| XR_147073.1        | up   | 1.3626261  |
| TCONS_00097476     | down | -2.482061  |
| TCONS_00028302     | down | -2.533195  |
| NR_073076.1        | down | -1.7615175 |
| TCONS_00032005     | down | -1.8514994 |
| ENSRNOT00000073548 | down | -1.1509972 |
| TCONS_00047450     | down | -1.0805372 |
| ENSRNOT00000045789 | up   | 1.5714409  |
| XR_146665.1        | up   | 1.4629254  |
| TCONS_00029978     | up   | 2.5611386  |
| TCONS_00139883     | up   | 1.06638    |
| TCONS_00020472     | down | -1.0007029 |
| TCONS_00021843     | up   | 1.0208554  |
| TCONS_00025769     | down | -1.4430137 |
| XR_146190.1        | up   | 1.5546255  |
| TCONS_00122259     | up   | 1.4197555  |
| ENSRNOT00000051231 | down | -1.4286647 |
| TCONS_00002841     | up   | 1.1324997  |
| TCONS_00065281     | down | -1.0283473 |
| TCONS_00099990     | up   | 2.1161416  |
| TCONS_00128870     | up   | 1.7182331  |
| XR_147040.1        | down | -2.2507985 |
| TCONS_00074857     | down | -1.0339078 |
| ENSRNOT00000072821 | up   | 1.0926597  |
| TCONS_00091766     | up   | 1.4537076  |
| TCONS_00076218     | up   | 1.6384902  |
| TCONS_00135274     | up   | 1.2823224  |
| ENSRNOT00000049525 | up   | 1.5074728  |
| TCONS_00014432     | up   | 1.1991503  |
| TCONS_00135074     | down | -2.0141332 |
| ENSRNOT00000059551 | down | -1.5052159 |
| TCONS_00097346     | down | -2.3621163 |
| TCONS_00079238     | up   | 3.5122204  |
| TCONS_00135328     | down | -1.0794556 |
| TCONS_00115827     | down | -1.973335  |
| XR_146737.1        | down | -1.3651066 |
| TCONS_00097283     | down | -2.8616614 |
| TCONS_00139930     | down | -1.169996  |
| TCONS_00088223     | down | -1.8339462 |
| TCONS_00084215     | up   | 1.1630392  |
| TCONS_00007711     | up   | 1.3514094  |
| TCONS_00035929     | down | -1.0910039 |
| TCONS_00074968     | up   | 2.6672797  |
| XR_145833.1        | down | -1.7415347 |
| TCONS_00017238     | up   | 1.133662   |
| TCONS_00098085     | down | -2.4876971 |
| TCONS_00040051     | up   | 1.6365669  |
| ENSRNOT00000074553 | up   | 1.008112   |
| TCONS_00113540     | down | -1.2210298 |
| ENSRNOT00000029795 | up   | 1.6018476  |
| TCONS_00067514     | down | -1.8246927 |
| TCONS_00113675     | up   | 1.1708007  |
| TCONS_00044677     | down | -1.0541458 |
| TCONS_00056731     | down | -1.4748304 |

|                    |      |            |
|--------------------|------|------------|
| TCONS_00074324     | up   | 1.0428686  |
| uc.189+            | up   | 1.1337109  |
| TCONS_00113309     | down | -1.5032116 |
| TCONS_00063118     | up   | 1.0920157  |
| TCONS_00110801     | down | -1.4205966 |
| TCONS_00088841     | down | -1.2332952 |
| TCONS_00032093     | up   | 1.2236357  |
| ENSRNOT00000071164 | up   | 1.2885842  |
| TCONS_00125933     | up   | 1.82406    |
| TCONS_00089355     | up   | 2.0197515  |
| TCONS_00068017     | up   | 4.4516563  |
| TCONS_00081927     | down | -1.1992121 |
| TCONS_00139869     | down | -1.0203578 |
| TCONS_00103352     | down | -2.1280227 |
| XR_146719.1        | up   | 1.2157719  |
| TCONS_00054578     | down | -1.078357  |
| TCONS_00139798     | up   | 1.0523605  |
| TCONS_00129931     | down | -1.1114011 |
| TCONS_00041584     | up   | 3.3735924  |
| TCONS_00122293     | down | -2.0120113 |
| TCONS_00054419     | down | -2.169189  |
| TCONS_00054789     | up   | 1.1876512  |
| ENSRNOT00000074647 | down | -1.1569214 |
| TCONS_00032768     | up   | 1.809247   |
| TCONS_00098084     | down | -1.1142956 |
| TCONS_00123796     | up   | 2.0443602  |
| XR_145763.1        | up   | 1.4619336  |
| uc.307+            | down | -1.9043608 |
| TCONS_00122354     | down | -1.6751676 |
| ENSRNOT00000050301 | up   | 1.3030169  |
| TCONS_00106956     | up   | 1.351337   |
| XR_146641.1        | up   | 1.0455737  |
| TCONS_00035763     | up   | 4.473662   |
| TCONS_00017386     | up   | 1.3248148  |
| TCONS_00062607     | up   | 1.2426777  |
| TCONS_00075235     | up   | 1.0592535  |
| TCONS_00119162     | down | -1.9347858 |
| TCONS_00013739     | down | -1.2554743 |
| TCONS_00074474     | down | -1.9154383 |
| TCONS_00042254     | up   | 1.0671093  |
| TCONS_00086758     | down | -1.873812  |
| TCONS_00016231     | up   | 1.1190081  |
| TCONS_00096508     | down | -2.104673  |
| TCONS_00119359     | down | -1.1302016 |
| TCONS_00097699     | up   | 1.7233136  |
| TCONS_00085729     | down | -1.8822436 |
| XR_085680.3        | up   | 1.3769593  |
| ENSRNOT00000050796 | up   | 1.7427378  |
| TCONS_00124676     | up   | 1.4792376  |
| XR_146517.1        | down | -1.6043868 |
| TCONS_00088780     | up   | 1.3519444  |
| TCONS_00116760     | up   | 1.3359807  |
| TCONS_00041930     | up   | 1.2378974  |
| TCONS_00016206     | up   | 1.8035474  |
| TCONS_00129509     | down | -2.1086302 |
| TCONS_00125302     | down | -1.3296559 |

|                    |      |            |
|--------------------|------|------------|
| TCONS_00071161     | up   | 1.9440349  |
| TCONS_00089251     | down | -2.892447  |
| TCONS_00121756     | down | -1.9927031 |
| TCONS_00014238     | down | -1.3216239 |
| TCONS_00107535     | up   | 1.4837956  |
| TCONS_00058705     | up   | 1.0396609  |
| ENSRNOT00000033372 | down | -2.446689  |
| TCONS_00122082     | up   | 3.1239836  |
| ENSRNOT00000068335 | up   | 1.0183313  |
| ENSRNOT00000027754 | down | -1.3339252 |
| uc.245+            | down | -2.6871097 |
| TCONS_00044697     | up   | 2.7624881  |
| TCONS_00129923     | down | -1.5650015 |
| TCONS_00040466     | up   | 1.3720155  |
| TCONS_00027535     | down | -2.2352602 |
| TCONS_00069229     | up   | 1.6447635  |
| TCONS_00106583     | down | -1.7532475 |
| TCONS_00055820     | up   | 1.1149688  |
| TCONS_00027857     | down | -1.4221525 |
| TCONS_00091280     | up   | 1.0357928  |
| TCONS_00010933     | up   | 2.461871   |
| TCONS_00113876     | up   | 1.948      |
| TCONS_00053624     | up   | 1.3710194  |
| TCONS_00098352     | down | -2.8555083 |
| TCONS_00081072     | down | -1.0148923 |
| TCONS_00129590     | up   | 1.1578307  |
| TCONS_00010744     | down | -2.1600883 |
| TCONS_00028209     | down | -2.3106723 |
| XR_146550.1        | down | -1.023394  |
| TCONS_00100512     | up   | 4.221694   |
| TCONS_00122080     | up   | 2.1295009  |
| TCONS_00120694     | up   | 1.4992332  |
| TCONS_00113796     | up   | 1.2988019  |
| uc.356+            | down | -1.0531325 |
| TCONS_00074612     | down | -1.8524319 |
| TCONS_00075454     | down | -1.1470044 |
| TCONS_00107169     | up   | 1.0755262  |
| TCONS_00054410     | up   | 1.0121365  |
| TCONS_00041050     | up   | 1.7659411  |
| TCONS_00054216     | down | -1.3565397 |
| TCONS_00045190     | up   | 1.2379992  |
| TCONS_00017076     | up   | 4.040229   |
| TCONS_00045805     | up   | 2.7408638  |
| TCONS_00122374     | up   | 1.0978036  |
| XR_145872.1        | down | -2.528234  |
| XR_146191.1        | up   | 1.5999646  |
| TCONS_00007967     | up   | 1.3506207  |
| TCONS_00125828     | up   | 2.350133   |
| TCONS_00128337     | up   | 1.1798172  |
| TCONS_00045352     | up   | 1.3949156  |
| XR_008617.3        | down | -1.4230464 |
| TCONS_00113534     | down | -1.490164  |
| TCONS_00090092     | up   | 1.6012168  |
| TCONS_00139858     | up   | 1.1489048  |
| TCONS_00129443     | up   | 1.2987928  |
| TCONS_00050103     | down | -1.069947  |

|                    |      |            |
|--------------------|------|------------|
| TCONS_00059370     | up   | 1.8582058  |
| TCONS_00015853     | up   | 1.4523559  |
| XR_146843.1        | up   | 1.0471063  |
| TCONS_00050883     | up   | 3.885746   |
| ENSRNOT00000074203 | up   | 1.4176512  |
| TCONS_00017226     | up   | 1.566031   |
| XR_085975.3        | down | -1.5149217 |
| XR_146168.1        | down | -1.102602  |
| TCONS_00110635     | up   | 1.984283   |
| TCONS_00121509     | up   | 1.1305614  |
| ENSRNOT00000036130 | down | -1.4321547 |
| TCONS_00131403     | up   | 1.861163   |
| TCONS_00111079     | up   | 2.6966476  |
| TCONS_00049066     | up   | 1.1109228  |
| TCONS_00079437     | down | -2.0571573 |
| ENSRNOT00000037406 | down | -1.4496727 |
| ENSRNOT00000066948 | down | -1.5382769 |
| TCONS_00088882     | up   | 1.7717175  |
| TCONS_00016745     | up   | 2.2773538  |
| ENSRNOT00000073196 | down | -1.5012629 |
| TCONS_00030209     | down | -1.0198169 |
| XR_145917.1        | down | -5.0487776 |
| TCONS_00040598     | down | -1.6213546 |
| TCONS_00031813     | up   | 2.9362016  |
| TCONS_00017488     | down | -1.3783944 |
| TCONS_00113633     | up   | 1.8898153  |
| TCONS_00096837     | up   | 1.4808087  |
| TCONS_00062399     | down | -1.0826483 |
| TCONS_00089951     | down | -2.0718052 |
| TCONS_00063145     | down | -1.49542   |
| TCONS_00045818     | up   | 1.2884536  |
| XR_147025.1        | up   | 1.3795872  |
| TCONS_00132248     | up   | 1.2137642  |
| TCONS_00113431     | up   | 1.6705589  |
| TCONS_00135015     | down | -1.0544786 |
| TCONS_00050049     | up   | 1.6881876  |
| ENSRNOT00000005365 | up   | 1.2036991  |
| XR_085607.2        | down | -1.1446409 |
| ENSRNOT00000016007 | down | -1.6524417 |
| TCONS_00110169     | up   | 1.0023985  |
| XR_146912.1        | up   | 2.7166119  |
| XR_008869.3        | down | -1.135107  |
| TCONS_00122236     | down | -1.0110934 |
| TCONS_00082000     | down | -1.6531777 |
| XR_146340.1        | down | -1.1579852 |
| XR_146130.1        | up   | 1.6870136  |
| TCONS_00006619     | up   | 1.3104157  |
| TCONS_00113618     | down | -1.6441951 |
| TCONS_00014660     | down | -1.239099  |
| TCONS_00054414     | up   | 1.7128668  |
| XR_086274.2        | down | -1.2990065 |
| TCONS_00073371     | down | -1.2535357 |
| XR_145867.1        | down | -1.1193457 |
| TCONS_00074423     | down | -1.6941681 |
| TCONS_00009939     | down | -1.6426992 |
| TCONS_00062560     | up   | 1.0946677  |

---

|                    |      |            |
|--------------------|------|------------|
| TCONS_00092416     | down | -2.2224002 |
| TCONS_00000354     | up   | 1.5295734  |
| TCONS_00062817     | down | -1.8712993 |
| TCONS_00107081     | up   | 1.7334664  |
| uc.420+            | down | -1.5237739 |
| TCONS_00117525     | up   | 1.012218   |
| XR_146193.1        | down | -1.1415067 |
| TCONS_00076643     | up   | 1.106457   |
| uc.40+             | down | -4.8941436 |
| TCONS_00054488     | down | -1.1872592 |
| ENSRNOT00000022127 | down | -1.0694399 |
| ENSRNOT00000011847 | down | -1.0244884 |

---
