# Supplementary material
Source: HighWire-hosted journal article supplement (https://hw-f5-jim.highwire.org/content/jim-2020-001471)
Supplement: inline-supplementary-material-2 [file inline-supplementary-material-2.pdf]

Table S2 The differentially expressed mRNAs

| GeneSymbol | Regulation | Fold Change (log2) |
|------------|------------|--------------------|
| Abcg1      | down       | -2.440661773       |
| Fbln1      | down       | -2.097782417       |
| Dpt        | down       | -2.093910368       |
| Col15a1    | down       | -2.063687548       |
| Bcl2       | down       | -2.035048289       |
| Snn        | down       | -2.033659755       |
| Naaa       | down       | -2.005174695       |
| Clec2g     | down       | -2.003707392       |
| Sema7a     | down       | -1.978198346       |
| Fam73b     | down       | -1.938868855       |
| Cd302      | down       | -1.935031101       |
| Tnfrsf11b  | down       | -1.931646523       |
| Susd2      | down       | -1.924362998       |
| Emb        | down       | -1.908191816       |
| Klhl29     | down       | -1.900921633       |
| Dtx4       | down       | -1.888414051       |
| Fam181b    | down       | -1.885826164       |
| Adams9     | down       | -1.883891535       |
| Lbp        | down       | -1.871243252       |
| Plekha2    | down       | -1.870194112       |
| Phyhipl    | down       | -1.865985697       |
| Nab2       | down       | -1.86535418        |
| Extl2      | down       | -1.85488564        |
| Lrrc17     | down       | -1.83978776        |
| Gsta2      | down       | -1.834973897       |
| Cyp7b1     | down       | -1.827926932       |
| Mid1       | down       | -1.823225735       |
| C1qtnf7    | down       | -1.822392091       |
| Ccr1       | down       | -1.796714079       |
| Frem1      | down       | -1.796045858       |
| Glt8d2     | down       | -1.783285716       |
| Hpx        | down       | -1.782206298       |
| Wisp1      | down       | -1.781575281       |
| Ptx3       | down       | -1.773810851       |
| Clec4d     | down       | -1.758200591       |
| Mmp16      | down       | -1.757418853       |
| Etv1       | down       | -1.75635611        |
| Ptn        | down       | -1.75213976        |
| Rnf145     | down       | -1.746596152       |
| Pank1      | down       | -1.737675228       |
| Spata9     | down       | -1.73436244        |
| Grem2      | down       | -1.728641761       |
| Nptx1      | down       | -1.723024767       |
| Aspn       | down       | -1.722134594       |
| Prss35     | down       | -1.714190004       |
| Lama1      | down       | -1.69919148        |
| Traf3ip2   | down       | -1.695036609       |
| Tlr8       | down       | -1.689273259       |
| Cd38       | down       | -1.689063501       |
| Sfrp2      | down       | -1.683791801       |
| Abcc3      | down       | -1.682446752       |
| Isoc1      | down       | -1.671266459       |
| Spock1     | down       | -1.660846536       |

|           |      |              |
|-----------|------|--------------|
| Aox1      | down | -1.660837266 |
| Arl11     | down | -1.658942338 |
| Srebf1    | down | -1.651717872 |
| Pik3ip1   | down | -1.648920137 |
| Galnt12   | down | -1.643202829 |
| Enpp2     | down | -1.642549341 |
| Ncf2      | down | -1.642444279 |
| Gk        | down | -1.63989865  |
| Tmprss11d | down | -1.639771423 |
| Tsr2      | down | -1.636080857 |
| Srpx      | down | -1.630319514 |
| Cd180     | down | -1.626289691 |
| Il6r      | down | -1.617860321 |
| Rnasel    | down | -1.613671916 |
| Dennd3    | down | -1.61306393  |
| Slamf6    | down | -1.600694099 |
| Rnf128    | down | -1.600663925 |
| Mybph     | down | -1.598693385 |
| Cybrd1    | down | -1.597927635 |
| Angpt2    | down | -1.591405974 |
| Mr1       | down | -1.586123771 |
| Pde1a     | down | -1.578113867 |
| Cmklr1    | down | -1.577998404 |
| Npr3      | down | -1.570464937 |
| Gpm6b     | down | -1.568246668 |
| Mmp11     | down | -1.558816876 |
| Atp6ap11  | down | -1.555681016 |
| Nat1      | down | -1.541005233 |
| Cul2      | down | -1.538340191 |
| Tnfaip6   | down | -1.530845661 |
| Abcd4     | down | -1.524945099 |
| Vcan      | down | -1.517099894 |
| Flrt3     | down | -1.516022077 |
| Senp7     | down | -1.515614565 |
| Galnt13   | down | -1.513093684 |
| Ftsj2     | down | -1.508810367 |
| Gnaz      | down | -1.503232442 |
| Plscr4    | down | -1.500387477 |
| Tnnt3     | down | -1.500182515 |
| Cped1     | down | -1.494761479 |
| Sult5a1   | down | -1.492242396 |
| Hr        | down | -1.48917396  |
| Scara5    | down | -1.477419179 |
| Egr2      | down | -1.477009533 |
| Lipg      | down | -1.473921176 |
| Serpib9   | down | -1.466610218 |
| Klk4      | down | -1.460842474 |
| Gal3st3   | down | -1.457160758 |
| Aldh3b1   | down | -1.456767429 |
| Echdc3    | down | -1.456529967 |
| Igfbp7    | down | -1.456424208 |
| Fndc1     | down | -1.445749326 |
| Soat2     | down | -1.439838    |
| Slc9a7    | down | -1.438142376 |
| Actrt3    | down | -1.430621534 |
| Lrrtm3    | down | -1.425646097 |

|          |      |              |
|----------|------|--------------|
| Itgb6    | down | -1.423394676 |
| Ssc5d    | down | -1.417197733 |
| Dtx3l    | down | -1.408272563 |
| Ngfr     | down | -1.401852289 |
| Nrarp    | down | -1.40102289  |
| Man1a1   | down | -1.396971345 |
| Ifit2    | down | -1.396923191 |
| Cox7c    | down | -1.391008403 |
| Tecr1    | down | -1.387699235 |
| Adra1b   | down | -1.38429682  |
| Pdgfra   | down | -1.38349751  |
| Pcdhb3   | down | -1.382119071 |
| Pbk      | down | -1.375720566 |
| Hfe      | down | -1.375274549 |
| Ebf3     | down | -1.37165649  |
| Arhgap8  | down | -1.371471573 |
| Frzb     | down | -1.369433039 |
| Prdm6    | down | -1.368688474 |
| Elovl6   | down | -1.366798026 |
| Scgb2b24 | down | -1.366342727 |
| Kcnk6    | down | -1.364277348 |
| Fam180a  | down | -1.363385817 |
| Irgm     | down | -1.362463742 |
| Kcnd1    | down | -1.360793527 |
| Lpar1    | down | -1.360394335 |
| B4galt6  | down | -1.359175848 |
| Calcr1   | down | -1.3581737   |
| Reep5    | down | -1.356836456 |
| Ccnyl1   | down | -1.354234286 |
| Isg15    | down | -1.353158731 |
| Adamtsl3 | down | -1.34374126  |
| S100a3   | down | -1.342755248 |
| Trmt10b  | down | -1.338772028 |
| Fcgr3a   | down | -1.336967454 |
| Echdc2   | down | -1.335419121 |
| Lrrtm2   | down | -1.334740545 |
| Msr1     | down | -1.334183725 |
| Ncdn     | down | -1.330892533 |
| Chd6     | down | -1.32723172  |
| Tcf21    | down | -1.320974771 |
| Rep15    | down | -1.320616761 |
| Tmprss13 | down | -1.319645704 |
| Kcnip3   | down | -1.318213522 |
| Smarca2  | down | -1.317447916 |
| Gulp1    | down | -1.316989827 |
| Slco4a1  | down | -1.316769016 |
| Epha3    | down | -1.315925586 |
| Zdhhc14  | down | -1.314589397 |
| Bcl11b   | down | -1.308634969 |
| Gldn     | down | -1.308613011 |
| A2m      | down | -1.305427519 |
| Abhd3    | down | -1.304541797 |
| Pcdhga10 | down | -1.301718313 |
| Abhd6    | down | -1.297089216 |
| Sbsn     | down | -1.296230311 |
| Angpt1   | down | -1.295571949 |

|          |      |              |
|----------|------|--------------|
| Col24a1  | down | -1.293935995 |
| Cilp     | down | -1.292305301 |
| Pla2g4a  | down | -1.288307177 |
| Nags     | down | -1.285731429 |
| Cars2    | down | -1.285448765 |
| Abi3bp   | down | -1.284457136 |
| Pecr     | down | -1.280794064 |
| Hmcn1    | down | -1.279011612 |
| Tcf7     | down | -1.275944597 |
| Nipsnap1 | down | -1.27460535  |
| Nckap11  | down | -1.274343306 |
| Clec5a   | down | -1.265180077 |
| Cxcl5    | down | -1.262769105 |
| Galnt2   | down | -1.262553098 |
| Pla2g2a  | down | -1.256959788 |
| Mpeg1    | down | -1.255140612 |
| Ccl11    | down | -1.254075126 |
| Ttc9     | down | -1.253186992 |
| Rbm43    | down | -1.253009309 |
| Dse      | down | -1.249144884 |
| P2rx5    | down | -1.248744349 |
| Icos     | down | -1.245795962 |
| Tnfrsf18 | down | -1.2454527   |
| Plcx3    | down | -1.242623986 |
| Nod1     | down | -1.242243281 |
| Cpxm2    | down | -1.241918241 |
| Igfbp6   | down | -1.241221133 |
| Ccna2    | down | -1.238049165 |
| Rtn1     | down | -1.237886314 |
| Prodh    | down | -1.236554155 |
| Cntn2    | down | -1.236460896 |
| Rspo4    | down | -1.233073048 |
| Cep72    | down | -1.231998361 |
| Stc2     | down | -1.230684751 |
| Tspan5   | down | -1.2300525   |
| Apln     | down | -1.22648959  |
| Arhgef19 | down | -1.22471722  |
| Tns4     | down | -1.224313362 |
| Lhfp11   | down | -1.223399241 |
| Naalad12 | down | -1.219960621 |
| Clspn    | down | -1.219007633 |
| Atp8b4   | down | -1.21427477  |
| Rasd2    | down | -1.210707859 |
| Rab38    | down | -1.208872834 |
| Bdnf     | down | -1.207913351 |
| Tpsg1    | down | -1.207848403 |
| Scrn1    | down | -1.205765851 |
| Nr2f2    | down | -1.203105765 |
| Fam84b   | down | -1.202154348 |
| Sh3gl2   | down | -1.201974795 |
| Rnft2    | down | -1.201514339 |
| Ptgr2    | down | -1.201181371 |
| Ccdc24   | down | -1.200032607 |
| Rbfox1   | down | -1.198800011 |
| Six3     | down | -1.196989947 |
| Slc7a4   | down | -1.196517012 |

|         |      |              |
|---------|------|--------------|
| Hoxd10  | down | -1.19419316  |
| Mpp2    | down | -1.193790314 |
| Wdr5b   | down | -1.185477928 |
| Ccl3    | down | -1.184346003 |
| Jph3    | down | -1.183284431 |
| Pcdh18  | down | -1.179880395 |
| Cpa5    | down | -1.179538954 |
| Rapgef3 | down | -1.178699559 |
| Pi15    | down | -1.17751044  |
| Mrps28  | down | -1.175997462 |
| Igfbp4  | down | -1.175114107 |
| Ikbke   | down | -1.173882193 |
| Ggta1p  | down | -1.171218905 |
| Kcns3   | down | -1.167652536 |
| Col16a1 | down | -1.162506693 |
| Gpr150  | down | -1.158710965 |
| Ascl2   | down | -1.156788958 |
| Bche    | down | -1.156599356 |
| Lap3    | down | -1.156171617 |
| Robo2   | down | -1.154013382 |
| G0s2    | down | -1.150292309 |
| Gpr135  | down | -1.147868209 |
| Siglec5 | down | -1.147835429 |
| Lurap11 | down | -1.143363896 |
| Cbx7    | down | -1.142315699 |
| St8sia2 | down | -1.138474115 |
| Gent2   | down | -1.138276922 |
| Cobl    | down | -1.138183738 |
| Grap2   | down | -1.138035024 |
| Hpgds   | down | -1.135222507 |
| Stat5a  | down | -1.135217345 |
| Alox5   | down | -1.133597967 |
| Slit3   | down | -1.131290643 |
| Psat1   | down | -1.130827107 |
| Tap2    | down | -1.130766722 |
| Ranbp31 | down | -1.12851139  |
| Casp6   | down | -1.127628078 |
| Cd200   | down | -1.127501655 |
| Cyp4f39 | down | -1.124369709 |
| Fundc1  | down | -1.121561494 |
| Smagp   | down | -1.121337147 |
| Napsa   | down | -1.119698088 |
| Cstf2   | down | -1.119229265 |
| Lrrc27  | down | -1.118293187 |
| Ptprz1  | down | -1.118170641 |
| Lrrc10  | down | -1.114438096 |
| Ppp2r2b | down | -1.112946124 |
| Rbp4    | down | -1.112267718 |
| Pros1   | down | -1.111065954 |
| Nudt10  | down | -1.111013767 |
| C1qtnf1 | down | -1.110523992 |
| Akap5   | down | -1.105751005 |
| Hus1b   | down | -1.104246696 |
| Gareml  | down | -1.103897473 |
| Wnt5a   | down | -1.101883533 |
| Pdia2   | down | -1.097745827 |

|          |      |              |
|----------|------|--------------|
| Syt17    | down | -1.097445118 |
| Flvcr2   | down | -1.09687887  |
| Mab2113  | down | -1.095972093 |
| Ptgrfr   | down | -1.095886333 |
| Dhx35    | down | -1.095290767 |
| Scn2b    | down | -1.094518494 |
| Pus10    | down | -1.094429023 |
| Tnrc6a   | down | -1.091420226 |
| Arhgap30 | down | -1.090194767 |
| Gpr88    | down | -1.090068624 |
| Kcnb2    | down | -1.088932902 |
| Apcdd1   | down | -1.087280146 |
| Tmem26   | down | -1.08697296  |
| Acp5     | down | -1.085329746 |
| Aoah     | down | -1.081768317 |
| Car3     | down | -1.081327537 |
| Flrt2    | down | -1.080968427 |
| Crtac1   | down | -1.080647976 |
| Trem3    | down | -1.078784415 |
| Tstd3    | down | -1.078313484 |
| Tas2r138 | down | -1.07287469  |
| Aldh1a7  | down | -1.07184126  |
| Stc1     | down | -1.070721875 |
| Fibin    | down | -1.069066819 |
| Nrk      | down | -1.068796047 |
| Paqr7    | down | -1.068576589 |
| Hs6st2   | down | -1.068042649 |
| Gent4    | down | -1.067309386 |
| Dao      | down | -1.06681687  |
| Rerg     | down | -1.066503124 |
| Lrat     | down | -1.065990706 |
| Dpep2    | down | -1.064680113 |
| Hells    | down | -1.064277493 |
| Mrps14   | down | -1.061789124 |
| Slc2a10  | down | -1.061279195 |
| Lrrn4    | down | -1.060836165 |
| Bmper    | down | -1.059052066 |
| Il1r1    | down | -1.059042452 |
| Sgcd     | down | -1.058659505 |
| Tlr3     | down | -1.05814708  |
| Sorl1    | down | -1.055824924 |
| Kctd14   | down | -1.055541397 |
| Gpr81    | down | -1.052702024 |
| Tdp2     | down | -1.051728715 |
| Glrx     | down | -1.051372317 |
| Nkapl    | down | -1.049997383 |
| Slc4a9   | down | -1.048661968 |
| Fancb    | down | -1.046917126 |
| Ly6d     | down | -1.046707542 |
| Pde3a    | down | -1.046165183 |
| Slc35f4  | down | -1.045417202 |
| Ces1c    | down | -1.041914643 |
| Pcdhgb7  | down | -1.040175554 |
| Vcam1    | down | -1.039658507 |
| Unc79    | down | -1.037915913 |
| Obp2b    | down | -1.036137556 |

|          |      |              |
|----------|------|--------------|
| Sbspon   | down | -1.035219356 |
| Postn    | down | -1.034326176 |
| Helz     | down | -1.033247557 |
| Il27ra   | down | -1.032208358 |
| Zfp786   | down | -1.029360625 |
| Kcnk9    | down | -1.028985112 |
| Igfbp5   | down | -1.028087117 |
| Bmp15    | down | -1.027229426 |
| Clec7a   | down | -1.025014008 |
| Dapp1    | down | -1.023016682 |
| Birc7    | down | -1.022322232 |
| Dkk3     | down | -1.022051691 |
| Henmt1   | down | -1.021667987 |
| Ptprc    | down | -1.018934567 |
| Syt3     | down | -1.01866805  |
| Cd83     | down | -1.017684152 |
| Ntf3     | down | -1.015426664 |
| Lum      | down | -1.014295119 |
| Ash11    | down | -1.013107388 |
| Vwde     | down | -1.012673905 |
| Cers1    | down | -1.012420851 |
| Adamts5  | down | -1.012267649 |
| Pcdhb2   | down | -1.011525667 |
| Fmnl1    | down | -1.009282156 |
| Hhex     | down | -1.008787274 |
| Slc6a15  | down | -1.008487362 |
| Acvr1l   | down | -1.006956797 |
| Naalad2  | down | -1.006797993 |
| Agphd1   | down | -1.006274561 |
| Slc51a   | down | -1.006243595 |
| Mrgprx2  | down | -1.005489004 |
| Adra2a   | down | -1.004467647 |
| Ypel4    | down | -1.003457563 |
| Mageb4   | down | -1.002005473 |
| Lrrd1    | up   | 1.000315479  |
| Ephx3    | up   | 1.006769954  |
| Pax6     | up   | 1.007150395  |
| Lipk     | up   | 1.008761638  |
| Slco6c1  | up   | 1.010041493  |
| Prr7     | up   | 1.012967385  |
| Obox1    | up   | 1.013725704  |
| Tfap4    | up   | 1.014887126  |
| Xkr4     | up   | 1.02118633   |
| Mapk8ip2 | up   | 1.021844722  |
| Pzp      | up   | 1.023534374  |
| Jakmip1  | up   | 1.027912752  |
| A1bg     | up   | 1.032824006  |
| Tnc      | up   | 1.03707341   |
| Ldlr     | up   | 1.03739416   |
| Snx11    | up   | 1.037925208  |
| Zdhhc11  | up   | 1.040433286  |
| Iqcf3    | up   | 1.043343516  |
| Trpv1    | up   | 1.044682106  |
| Stfa2l1  | up   | 1.046203053  |
| Lim2     | up   | 1.046547641  |
| Pmfbp1   | up   | 1.046887544  |

|          |    |             |
|----------|----|-------------|
| Cdk5r1   | up | 1.049538772 |
| Cpn1     | up | 1.050377634 |
| Il9r     | up | 1.050990319 |
| Macrod2  | up | 1.051374711 |
| Smad3    | up | 1.05156711  |
| Krt39    | up | 1.051759899 |
| Tp73     | up | 1.055005046 |
| Phox2a   | up | 1.059707661 |
| Vsig2    | up | 1.062008318 |
| Dmrt1    | up | 1.062758025 |
| Nsl1     | up | 1.063012606 |
| Slc5a8   | up | 1.067884678 |
| Cd8a     | up | 1.06894219  |
| Spink14  | up | 1.070313473 |
| Clec4b2  | up | 1.070755345 |
| Hyal5    | up | 1.072327531 |
| Vgf      | up | 1.072392513 |
| Cdca2    | up | 1.072845986 |
| Mapk4    | up | 1.07855499  |
| Tas2r144 | up | 1.086418062 |
| Snx15    | up | 1.087176313 |
| Banf2    | up | 1.095580048 |
| Defb39   | up | 1.097655944 |
| Ube2t    | up | 1.101577487 |
| Stfa3    | up | 1.109836456 |
| Nek2     | up | 1.117743926 |
| Adamts3  | up | 1.117947391 |
| Foxg1    | up | 1.120036157 |
| Disc1    | up | 1.121471127 |
| Tprg1    | up | 1.125094998 |
| Gpr119   | up | 1.127675973 |
| Plcxd2   | up | 1.128538287 |
| Dhrs9    | up | 1.132462152 |
| Asip     | up | 1.135903838 |
| Nuf2     | up | 1.13986658  |
| Angptl1  | up | 1.14326261  |
| Ffar1    | up | 1.150316201 |
| Ankrd7   | up | 1.158488975 |
| Insc     | up | 1.159335632 |
| Cnr1     | up | 1.159622276 |
| Cnksr2   | up | 1.162503966 |
| Asphd2   | up | 1.16503631  |
| Fabp2    | up | 1.169943687 |
| Ccdc64b  | up | 1.171004798 |
| Onecut1  | up | 1.1714245   |
| Tekt5    | up | 1.174427871 |
| Cldn17   | up | 1.177639585 |
| Fam221a  | up | 1.179907226 |
| Gprc5a   | up | 1.180351964 |
| Asgr1    | up | 1.190605867 |
| Ing3     | up | 1.193214748 |
| Krt9     | up | 1.2004766   |
| Tmco5a   | up | 1.209946536 |
| Kbtbd6   | up | 1.21446348  |
| Hoxb7    | up | 1.22492521  |
| Mbd3l2   | up | 1.225273112 |



|         |    |             |
|---------|----|-------------|
| Spatc11 | up | 1.248484267 |
| Smim17  | up | 1.257083219 |
| Sfn     | up | 1.25783444  |
| Lgi2    | up | 1.259845406 |
| Crip3   | up | 1.260004988 |
| Fam72a  | up | 1.267691506 |
| Iqcg    | up | 1.274539556 |
| Dcc     | up | 1.277621715 |
| Ccdc7   | up | 1.278641206 |
| Lcn8    | up | 1.279705861 |
| Skap1   | up | 1.285663782 |
| Ccdc178 | up | 1.30418333  |
| Spc25   | up | 1.309224225 |
| Armc2   | up | 1.312631769 |
| Ccdc81  | up | 1.317151412 |
| Hgf     | up | 1.32832054  |
| Iapp    | up | 1.330606848 |
| Ica11   | up | 1.335624863 |
| Nlrp12  | up | 1.3422488   |
| Gpr143  | up | 1.352540377 |
| Sult1c2 | up | 1.359247926 |
| Lrrc30  | up | 1.380210069 |
| Gdf9    | up | 1.392296855 |
| Myo5b   | up | 1.393297448 |
| Foxr1   | up | 1.3965553   |
| Chst4   | up | 1.397194194 |
| Ppfia3  | up | 1.398905222 |
| Nova2   | up | 1.407978772 |
| Cldn1   | up | 1.411452526 |
| Adrbk2  | up | 1.427199193 |
| Slc38a5 | up | 1.433459662 |
| Amhr2   | up | 1.43805935  |
| Gcg     | up | 1.451062123 |
| Hoxb6   | up | 1.453300324 |
| Doc2b   | up | 1.46409386  |
| Gabbr1  | up | 1.465267239 |
| Ndst4   | up | 1.473993315 |
| Crx     | up | 1.485864765 |
| Spint1  | up | 1.501539767 |
| Tekt3   | up | 1.504530134 |
| Smcp    | up | 1.522498445 |
| Sel1l2  | up | 1.556454865 |
| St8sia5 | up | 1.571889579 |
| Pnpla1  | up | 1.583385837 |
| Baat    | up | 1.59626671  |
| Nr6a1   | up | 1.608247113 |
| Faslg   | up | 1.638955618 |
| Cela3b  | up | 1.665455021 |
| Txndc2  | up | 1.684564434 |
| Lalba   | up | 1.945057487 |
| Kcne2   | up | 2.076914957 |
